# Supplementary material for: Cross-cultural adaptation and psychometric properties of the Arabic version of the Central Sensitization Inventory in people with chronic musculoskeletal pain
Source: PeerJ. 2024 Oct 8;12:e18251. doi: 10.7717/peerj.18251 (PMC11468962; doi:10.7717/peerj.18251)
Supplement: Supplemental Information 2 [file peerj-12-18251-s002.xlsx]

## Sheet: data
ID	Do you suffer from any pain or inflammation in the joints, muscles or bones (example: neck pain, back pain, knee pain, shoulder pain, elbow pain, wrist/palm pain, hip pain, ankle pain, foot) , arthritis, fibromyalgia, osteoarthritis) for 3 months or more?	Do you suffer from any of the following: neurological disease, tumor, spinal cord injury, Alzheimer's, or multiple sclerosis?	Age (in years)	Height (centimeters)	Weight (kg)	Sex	marital status	Do you smoke	education level	Do you suffer from physical pain?	Do you suffer from body pain that lasts for at least three months? If the answer is yes, please choose the area/areas where you felt pain from the following list:	[1- I feel tired and not refreshed when I wake up.]	[2- I feel pain and stiffness in my muscles]	[3- I have anxiety attacks.]	[4- I grind my teeth.]	[5- I have problems with diarrhea and/or constipation.]	[6-I need help performing my daily activities.]	[7- I am sensitive to bright lights.]	[8- I get tired very easily when I am physically active.]	[9- I feel pain all over my body.]	[10- I suffer from headaches.]	[11- I feel discomfort in my bladder and/or a burning sensation when urinating.]	[12- I don't sleep well.]	[13- I find it difficult to concentrate.]	[14- I suffer from skin problems such as dryness, itching, or rashes.]	[15- Stress makes my physical symptoms worse.]	[16- I feel sad or depressed.]	[17- I have low energy.]	[18- I have muscle tension in my neck and shoulders.]	[19- I have pain in my jaw.]	[20- Some smells, like perfume, make me feel dizzy and nauseous.]	[21- I have to urinate frequently.]	[22- I feel uncomfortable and tight in my legs when I try to sleep at night.]	[23-I have difficulty remembering things.]	[24- I experienced trauma as a child.]	[25- I suffer from pain in the pelvic area.]	1- Restless leg syndrome	2- Chronic fatigue syndrome	3- Fibromyalgia syndrome	4- Temporomandibular joint disorder	5- Migraine or tension headache	6- Irritable bowel syndrome	7- Multiple chemical sensitivities	8- Neck injury (including neck injury in a traffic accident)	9- Anxiety or panic attacks	10- Depression (depression)	Please choose a pain score from 0-10, where (0) is no pain, and (10) is the worst pain*	[1- I worry all the time about whether the pain will end or not]	[2- I feel that I cannot continue the pain I am feeling]
1	Yes	no	38	153	81	female	married	I don't smoke at all	Bachelor's	Yes	Neck, shoulder, lower back, knee	always	always	always	sometimes	always	sometimes	sometimes	sometimes	always	Scarcely	Scarcely	mostly	mostly	mostly	mostly	always	always	always	sometimes	sometimes	Scarcely	never	Scarcely	sometimes	Scarcely	no	no	no	no	no	Yes	no	no	Yes	Yes	8	4- Yes, at all times	4- Yes, at all times
2	Yes	no	55	175	86	female	divorced	I don't smoke at all	secondary	Yes	Neck, shoulder, hip, thigh, ankle and foot	always	always	always	never	mostly	sometimes	sometimes	always	always	sometimes	Scarcely	always	sometimes	sometimes	always	sometimes	always	always	sometimes	never	always	mostly	sometimes	never	always	no	no	no	no	no	no	no	no	no	no	10	4- Yes, at all times	3- Yes, to a large extent
3	Yes	no	29	160	90	female	married	I don't smoke at all	Bachelor's	Yes	lower back	sometimes	never	never	never	Scarcely	sometimes	Scarcely	Scarcely	Scarcely	sometimes	sometimes	sometimes	sometimes	never	sometimes	sometimes	sometimes	never	never	sometimes	never	never	never	sometimes	never	no	no	no	no	no	no	no	no	no	no	5	0 = Not at all	0 = Not at all
4	Yes	no	31	161	50	female	single	I don't smoke at all	Bachelor's	Yes	Neck, shoulder	sometimes	sometimes	never	never	never	never	Scarcely	never	Scarcely	sometimes	never	Scarcely	Scarcely	never	never	never	never	mostly	never	never	never	Scarcely	never	never	never	no	no	no	no	no	no	no	no	no	no	3	1- Yes, to a simple extent	0 = Not at all
5	Yes	no	46	151	76	female	married	I don't smoke at all	Bachelor's	Yes	lower back	mostly	Scarcely	never	never	sometimes	never	sometimes	mostly	mostly	Scarcely	Scarcely	never	sometimes	sometimes	Scarcely	Scarcely	never	never	never	never	sometimes	sometimes	sometimes	never	mostly	no	no	no	no	no	no	no	no	no	no	8	2- Yes, to a moderate extent	1- Yes, to a simple extent
6	Yes	no	24	153	66	female	single	I don't smoke at all	Bachelor's	Yes	knee	sometimes	mostly	Scarcely	never	never	sometimes	never	sometimes	Scarcely	sometimes	never	sometimes	Scarcely	never	mostly	sometimes	sometimes	Scarcely	never	never	never	never	never	never	never	no	no	no	no	no	no	no	no	no	no	5	2- Yes, to a moderate extent	1- Yes, to a simple extent
7	Yes	no	27	158	72	female	single	I don't smoke at all	Bachelor's	Yes	Lower back, hip, thigh, knee	sometimes	sometimes	Scarcely	never	never	never	sometimes	sometimes	sometimes	sometimes	never	Scarcely	sometimes	Scarcely	sometimes	sometimes	mostly	mostly	sometimes	never	never	Scarcely	sometimes	never	never	no	no	no	no	no	no	no	no	no	no	9	1- Yes, to a simple extent	4- Yes, at all times
8	Yes	no	27	151	55	female	single	Currently a smoker	Bachelor's	Yes	Neck, shoulder	sometimes	sometimes	Scarcely	never	always	never	Scarcely	sometimes	sometimes	sometimes	sometimes	sometimes	sometimes	never	Scarcely	mostly	sometimes	Scarcely	never	sometimes	sometimes	sometimes	sometimes	sometimes	sometimes	no	no	no	no	no	no	no	no	no	no	4	2- Yes, to a moderate extent	0 = Not at all
9	Yes	no	30	166	73	female	married	I don't smoke at all	Master's	Yes	Neck, shoulder, lower back, knee, ankle and foot	sometimes	sometimes	mostly	sometimes	Scarcely	never	mostly	sometimes	sometimes	sometimes	never	Scarcely	sometimes	always	mostly	sometimes	sometimes	always	mostly	mostly	sometimes	never	sometimes	never	mostly	no	no	no	Yes				no	no	no	5	2- Yes, to a moderate extent	1- Yes, to a simple extent
10	Yes	no	28	162	60	female	single	I don't smoke at all	Bachelor's	Yes	Neck, shoulder, upper back	mostly	mostly	sometimes	never	Scarcely	never	never	never	never	never	never	mostly	sometimes	never	always	mostly	sometimes	always	never	Scarcely	never	never	never	never	never	no	no	no	no	no	no	no	no	no	no	4	1- Yes, to a simple extent	0 = Not at all
11	Yes	no	26	163	80	male	single	Former smoker	Bachelor's	Yes	Ankle and foot	sometimes	Scarcely	mostly	mostly	sometimes	Scarcely	never	sometimes	mostly	mostly	never	always	sometimes	never	always	mostly	always	always	sometimes	never	sometimes	never	never	always	never	no	no	no	no	no	no	no	no	no	no	4	2- Yes, to a moderate extent	0 = Not at all
12	Yes	no	26	159	53	female	single	Currently a smoker	Bachelor's	Yes	Neck, shoulder, upper back, elbow	mostly	mostly	sometimes	always	mostly	never	never	sometimes	sometimes	Scarcely	never	never	Scarcely	never	never	never	mostly	always	never	never	mostly	never	Scarcely	never	never	no	no	no	no	no	no	no	no	no	no	4	0 = Not at all	0 = Not at all
13	Yes	no	28	163	64	female	single	I don't smoke at all	Bachelor's	Yes	Shoulder, knee	sometimes	Scarcely	never	never	never	Scarcely	Scarcely	sometimes	Scarcely	mostly	never	sometimes	sometimes	never	sometimes	Scarcely	Scarcely	sometimes	never	Scarcely	mostly	Scarcely	Scarcely	Scarcely	never	no	no	no	no	no	no	no	no	no	no	5	2- Yes, to a moderate extent	1- Yes, to a simple extent
14	Yes	no	25	165	54	male	single	Former smoker	Bachelor's	Yes	Lower back, wrist/palm	mostly	Scarcely	mostly	never	never	never	sometimes	sometimes	Scarcely	sometimes	never	never	Scarcely	never	Scarcely	mostly	sometimes	Scarcely	never	never	Scarcely	Scarcely	Scarcely	Scarcely	never	no	no	no	no	no	no	no	no	Yes	Yes	4	1- Yes, to a simple extent	0 = Not at all
15	Yes	no	33	178	145	male	single	Former smoker	Bachelor's	Yes	Neck, lower back, hip, thigh, knee	mostly	sometimes	Scarcely	never	sometimes	Scarcely	never	Scarcely	Scarcely	Scarcely	Scarcely	sometimes	sometimes	mostly	Scarcely	mostly	sometimes	sometimes	Scarcely	Scarcely	sometimes	sometimes	sometimes	Scarcely	Scarcely	no	no	no	no	no	no	no	no	no	Yes	5	1- Yes, to a simple extent	1- Yes, to a simple extent
16	Yes	no	27	168	60	female	single	Currently a smoker	Bachelor's	Yes	Wrist/palm, hip and thigh	mostly	Scarcely	mostly	never	sometimes	Scarcely	always	sometimes	Scarcely	mostly	never	Scarcely	sometimes	never	sometimes	mostly	sometimes	sometimes	never	sometimes	sometimes	sometimes	sometimes	Scarcely	mostly	no	no	no	no	no	Yes	no	no	no	no	5	2- Yes, to a moderate extent	0 = Not at all
17	Yes	no	31	179	74	male	single	Currently a smoker	Master's	Yes	upper back	never	sometimes	sometimes	never	never	never	never	never	never	sometimes	Scarcely	Scarcely	sometimes	never	sometimes	never	never	never	never	never	Scarcely	never	Scarcely	never	never	no	no	no	no	no	no	no	no	no	no	5	0 = Not at all	0 = Not at all
18	Yes	no	36	164	70	male	married	Currently a smoker	Bachelor's	Yes	Upper back, hip and thigh	mostly	mostly	mostly	sometimes	Scarcely	mostly	always	always	always	sometimes	never	sometimes	sometimes	mostly	mostly	never	mostly	mostly	never	sometimes	sometimes	sometimes	sometimes	mostly	sometimes	no	Yes	no	no	no	no	no	no	no	no	2	1- Yes, to a simple extent	1- Yes, to a simple extent
19	Yes	no	33	157	59	female	single	I don't smoke at all	Bachelor's	Yes	upper back	mostly	mostly	mostly	mostly	mostly	mostly	mostly	mostly	mostly	Scarcely	Scarcely	sometimes	sometimes	mostly	mostly	mostly	mostly	sometimes	never	mostly	mostly	mostly	mostly	mostly	mostly	no	no	no	no	no	no	no	no	Yes	Yes	5	3- Yes, to a large extent	3- Yes, to a large extent
20	Yes	no	36	165	56	female	single	I don't smoke at all	Master's	Yes	Shoulder, lower back, knee, ankle and foot	sometimes	sometimes	mostly	always	sometimes	never	sometimes	sometimes	sometimes	always	never	sometimes	Scarcely	mostly	Scarcely	Scarcely	sometimes	sometimes	always	sometimes	Scarcely	never	never	never	never	no	no	no	no	Yes	Yes	no	no	Yes	no	6	2- Yes, to a moderate extent	2- Yes, to a moderate extent
21	Yes	no	40	178	80	male	married	I don't smoke at all	Master's	Yes	Shoulder, upper back, lower back, wrist/palm, hip, thigh, ankle and foot	sometimes	Scarcely	sometimes	never	mostly	never	sometimes	sometimes	sometimes	sometimes	sometimes	sometimes	mostly	sometimes	Scarcely	sometimes	Scarcely	Scarcely	Scarcely	never	Scarcely	never	mostly	never	mostly	no	no	no	no	no	no	no	no	no	no	7	1- Yes, to a simple extent	1- Yes, to a simple extent
22	Yes	no	37	170	48	male	married	Currently a smoker	Master's	Yes	Neck, lower back, ankle and foot	mostly	sometimes	Scarcely	Scarcely	sometimes	sometimes	never	sometimes	mostly	never	never	mostly	Scarcely	Scarcely	mostly	Scarcely	sometimes	sometimes	never	sometimes	never	mostly	Scarcely	never	never	no	Yes	no	no	no	no	no	Yes	no	no	4	0 = Not at all	0 = Not at all
23	Yes	no	29	152	61	female	single	I don't smoke at all	Bachelor's	Yes	I do not experience pain in the areas mentioned above	mostly	mostly	Scarcely	sometimes	never	Scarcely	never	sometimes	never	Scarcely	never	mostly	sometimes	mostly	sometimes	sometimes	sometimes	Scarcely	sometimes	never	Scarcely	never	sometimes	Scarcely	mostly	no	no	no	no	no	no	no	no	no	no	5	0 = Not at all	0 = Not at all
24	Yes	no	35	178	80	male	married	Currently a smoker	Bachelor's	Yes	Neck, lower back	mostly	Scarcely	sometimes	Scarcely	mostly	never	Scarcely	sometimes	sometimes	Scarcely	sometimes	mostly	mostly	Scarcely	Scarcely	sometimes	sometimes	Scarcely	never	never	mostly	mostly	sometimes	mostly	sometimes	no	no	Yes	no	no	Yes	no	Yes	Yes	Yes	8	1- Yes, to a simple extent	1- Yes, to a simple extent
25	Yes	no	27	146	62	female	married	Currently a smoker	Bachelor's	Yes	Neck, shoulder	sometimes	sometimes	mostly	Scarcely	sometimes	Scarcely	never	never	never	mostly	Scarcely	Scarcely	Scarcely	sometimes	mostly	sometimes	Scarcely	mostly	never	never	never	never	never	never	never	no	no	no	no	no	no	no	no	no	no	5	1- Yes, to a simple extent	1- Yes, to a simple extent
26	Yes	no	42	165	89	female	married	Currently a smoker	Bachelor's	Yes	lower back	always	mostly	Scarcely	sometimes	sometimes	sometimes	Scarcely	mostly	sometimes	sometimes	Scarcely	sometimes	Scarcely	never	always	Scarcely	sometimes	always	sometimes	never	Scarcely	Scarcely	sometimes	Scarcely	Scarcely	no	no	no	no	no	Yes	no	no	no	no	9	3- Yes, to a large extent	2- Yes, to a moderate extent
27	Yes	no	41	158	54	female	married	I don't smoke at all	Bachelor's	Yes	Neck, shoulder	sometimes	sometimes	sometimes	Scarcely	never	never	never	never	never	sometimes	never	Scarcely	never	never	never	never	never	sometimes	Scarcely	never	never	never	Scarcely	never	never	no	no	no	no	no	no	no	no	no	no	2	1- Yes, to a simple extent	1- Yes, to a simple extent
28	Yes	no	32	178	89	male	married	Currently a smoker	Bachelor's	Yes	the neck	sometimes	mostly	sometimes	never	never	never	never	never	Scarcely	never	never	sometimes	never	sometimes	never	Scarcely	Scarcely	never	never	never	never	never	Scarcely	never	never	no	no	no	no	no	no	no	no	no	no	8	1- Yes, to a simple extent	3- Yes, to a large extent
29	Yes	no	33	160	118	female	single	Currently a smoker	Bachelor's	Yes	the shoulder	mostly	sometimes	mostly	always	never	Scarcely	Scarcely	mostly	sometimes	sometimes	sometimes	mostly	mostly	mostly	mostly	mostly	mostly	mostly	Scarcely	sometimes	Scarcely	sometimes	sometimes	mostly	never	no	no	no	no	no	no	no	no	no	no	4	2- Yes, to a moderate extent	2- Yes, to a moderate extent
30	Yes	no	52	165	71	female	married	I don't smoke at all	Bachelor's	Yes	knee	sometimes	sometimes	Scarcely	never	Scarcely	never	never	sometimes	sometimes	sometimes	sometimes	Scarcely	sometimes	never	sometimes	never	sometimes	never	never	Scarcely	Scarcely	sometimes	Scarcely	never	never	no	no	no	no	no	no	no	no	no	no	5	0 = Not at all	0 = Not at all
31	Yes	no	28	167	47	female	single	I don't smoke at all	Bachelor's	Yes	Neck, shoulder, knee, ankle and foot	sometimes	mostly	always	sometimes	sometimes	never	sometimes	mostly	mostly	always	sometimes	always	always	Scarcely	Scarcely	always	always	always	never	mostly	always	always	always	never	mostly	no	no	no	no	no	no	no	no	no	Yes	4	2- Yes, to a moderate extent	2- Yes, to a moderate extent
32	Yes	no	22	160	53	female	divorced	I don't smoke at all	Bachelor's	Yes	Neck, shoulder	sometimes	always	never	Scarcely	Scarcely	never	never	never	never	Scarcely	never	Scarcely	never	always	sometimes	sometimes	sometimes	always	never	never	never	never	never	never	never	no	no	no	no	no	no	no	no	no	no	2	3- Yes, to a large extent	2- Yes, to a moderate extent
33	Yes	no	28	177	120	female	divorced	Currently a smoker	Bachelor's	Yes	Ankle and foot	mostly	sometimes	sometimes	Scarcely	sometimes	sometimes	sometimes	mostly	Scarcely	sometimes	never	sometimes	Scarcely	mostly	mostly	mostly	mostly	mostly	never	never	Scarcely	never	mostly	mostly	never	no	no	no	no	Yes	no	no	no	no	no	5	0 = Not at all	2- Yes, to a moderate extent
34	Yes	no	25	160	120	male	single	Currently a smoker	Bachelor's	Yes	the shoulder	sometimes	mostly	never	never	sometimes	never	mostly	Scarcely	never	sometimes	never	sometimes	sometimes	never	mostly	Scarcely	mostly	mostly	never	Scarcely	mostly	never	never	never	never	no	no	no	no	Yes	no	no	no	no	no	6	3- Yes, to a large extent	2- Yes, to a moderate extent
35	Yes	no	26	170	88	male	single	Currently a smoker	Bachelor's	Yes	Ankle and foot	sometimes	never	never	never	sometimes	never	sometimes	never	Scarcely	sometimes	never	sometimes	Scarcely	never	Scarcely	Scarcely	sometimes	Scarcely	never	Scarcely	sometimes	Scarcely	sometimes	never	never	no	no	no	no	no	Yes	no	no	no	no	3	0 = Not at all	0 = Not at all
36	Yes	no	25	180	72	male	single	Former smoker	Bachelor's	Yes	Neck, shoulder, lower back	mostly	sometimes	sometimes	never	Scarcely	never	sometimes	sometimes	Scarcely	sometimes	Scarcely	mostly	sometimes	never	Scarcely	Scarcely	sometimes	sometimes	never	Scarcely	sometimes	never	Scarcely	never	never	no	no	no	no	no	no	no	no	no	no	4	1- Yes, to a simple extent	1- Yes, to a simple extent
37	Yes	no	25	178	92	male	single	Former smoker	Bachelor's	Yes	Neck, upper back, lower back, hip, thigh, knee	mostly	sometimes	Scarcely	never	Scarcely	never	never	sometimes	sometimes	sometimes	never	mostly	Scarcely	Scarcely	sometimes	sometimes	Scarcely	sometimes	sometimes	Scarcely	sometimes	Scarcely	Scarcely	Scarcely	mostly	no	no	no	no	no	no	no	no	no	no	7	3- Yes, to a large extent	2- Yes, to a moderate extent
38	Yes	no	26	172	82	male	single	Former smoker	Bachelor's	Yes	Shoulder, upper back, lower back, hip, thigh, knee, ankle and foot	sometimes	sometimes	sometimes	Scarcely	Scarcely	never	Scarcely	never	Scarcely	Scarcely	mostly	sometimes	never	Scarcely	mostly	never	Scarcely	sometimes	Scarcely	sometimes	sometimes	Scarcely	Scarcely	Scarcely	never	no	no	no	no	no	no	no	no	no	no	5	3- Yes, to a large extent	3- Yes, to a large extent
39	Yes	no	24	162	65	female	single	I don't smoke at all	Bachelor's	Yes	lower back	mostly	mostly	sometimes	sometimes	sometimes	never	never	Scarcely	never	Scarcely	never	sometimes	sometimes	never	Scarcely	sometimes	mostly	mostly	never	mostly	mostly	sometimes	always	always	never	no	no	no	no	no	no	no	no	no	no	2	0 = Not at all	1- Yes, to a simple extent
40	Yes	no	61	158	85	female	divorced	I don't smoke at all	Ph.D	Yes	Upper back, hip, thigh, knee	Scarcely	mostly	sometimes	Scarcely	sometimes	mostly	mostly	always	sometimes	Scarcely	never	always	never	never	Scarcely	Scarcely	never	Scarcely	never	never	never	never	Scarcely	never	sometimes	no	no	no	no	no	no	no	no	no	no	3	1- Yes, to a simple extent	2- Yes, to a moderate extent
41	Yes	no	51	121	63	female	married	I don't smoke at all	Bachelor's	Yes	Lower back, ankle and foot	sometimes	sometimes	sometimes	never	sometimes	Scarcely	never	never	sometimes	Scarcely	sometimes	sometimes	sometimes	never	never	sometimes	sometimes	sometimes	never	never	sometimes	sometimes	sometimes	sometimes	sometimes	no	no	no	no	no	no	no	no	no	no	7	1- Yes, to a simple extent	0 = Not at all
42	Yes	no	25	175	105	male	single	Former smoker	Bachelor's	Yes	Neck, wrist/palm	sometimes	never	mostly	never	sometimes	never	never	never	never	never	never	sometimes	never	never	never	sometimes	mostly	never	sometimes	never	never	never	never	never	never	no	no	no	no	no	no	no	no	no	no	2	0 = Not at all	0 = Not at all
43	Yes	no	55	156	80	female	married	I don't smoke at all	Bachelor's	Yes	Lower back, knee	mostly	Scarcely	never	never	never	never	Scarcely	sometimes	Scarcely	Scarcely	never	mostly	mostly	mostly	sometimes	never	mostly	never	never	never	Scarcely	never	sometimes	never	never	no	no	no	no	no	no	no	no	no	no	2	1- Yes, to a simple extent	1- Yes, to a simple extent
44	Yes	no	50	160	69	female	married	I don't smoke at all	Master's	Yes	Neck, shoulder, lower back	mostly	sometimes	Scarcely	never	Scarcely	never	never	Scarcely	Scarcely	sometimes	sometimes	Scarcely	never	never	sometimes	Scarcely	Scarcely	mostly	never	Scarcely	sometimes	never	never	never	never	no	no	no	no	no	no	no	no	no	no	6	1- Yes, to a simple extent	1- Yes, to a simple extent
45	Yes	no	31	178	76	male	married	Currently a smoker	Bachelor's	Yes	Neck, upper back, lower back	sometimes	sometimes	never	never	never	never	never	Scarcely	sometimes	mostly	never	sometimes	Scarcely	never	mostly	Scarcely	sometimes	sometimes	never	sometimes	never	never	never	never	never	no	no	no	no	no	no	no	no	no	no	3	2- Yes, to a moderate extent	0 = Not at all
46	Yes	no	63	142	91	female	married	I don't smoke at all	Ph.D	Yes	Ankle and foot	never	sometimes	never	never	never	sometimes	never	never	never	sometimes	never	sometimes	sometimes	sometimes	never	never	never	never	sometimes	never	never	sometimes	sometimes	never	never	no	no	no	no	no	no	no	no	no	no	0	0 = Not at all	0 = Not at all
47	Yes	no	62	173	87	male	married	I don't smoke at all	Bachelor's	Yes	lower back	mostly	always	Scarcely	never	always	sometimes	Scarcely	Scarcely	sometimes	never	Scarcely	mostly	sometimes	mostly	Scarcely	sometimes	sometimes	Scarcely	never	never	Scarcely	sometimes	sometimes	never	never	Yes	no	no	no	no	no	no	no	no	no	6	3- Yes, to a large extent	2- Yes, to a moderate extent
48	Yes	no	53	153	89	female	Widower	I don't smoke at all	primary	Yes	Neck, shoulder, upper back, lower back, knee	always	mostly	always	never	sometimes	always	never	never	mostly	sometimes	sometimes	sometimes	Scarcely	Scarcely	mostly	never	Scarcely	Scarcely	never	never	sometimes	mostly	sometimes	never	never	no	no	no	no	no	no	no	no	no	no	8	2- Yes, to a moderate extent	2- Yes, to a moderate extent
49	Yes	no	34	158	62	female	married	I don't smoke at all	Bachelor's	Yes	Neck, shoulder, upper back, lower back, wrist/palm	sometimes	sometimes	sometimes	mostly	mostly	Scarcely	sometimes	never	Scarcely	sometimes	sometimes	never	sometimes	sometimes	mostly	mostly	Scarcely	always	sometimes	Scarcely	always	sometimes	Scarcely	never	sometimes	no	Yes	no	no	Yes	no	no	Yes	Yes	Yes	7	2- Yes, to a moderate extent	2- Yes, to a moderate extent
50	Yes	no	52	153	51	female	married	I don't smoke at all	Bachelor's	Yes	Neck, shoulder, knee	sometimes	never	mostly	never	never	never	never	Scarcely	Scarcely	never	never	sometimes	never	never	never	Scarcely	never	mostly	never	Scarcely	never	never	never	never	never	no	no	no	no	no	no	no	no	no	no	6	2- Yes, to a moderate extent	0 = Not at all
51	Yes	no	47	157	61	female	divorced	I don't smoke at all	Bachelor's	Yes	Neck, shoulder, upper back, lower back, knee	sometimes	sometimes	sometimes	sometimes	sometimes	never	never	Scarcely	sometimes	never	sometimes	Scarcely	sometimes	sometimes	sometimes	sometimes	sometimes	sometimes	sometimes	never	sometimes	Scarcely	sometimes	Scarcely	sometimes	no	no	no	no	no	no	no	no	no	no	6	0 = Not at all	0 = Not at all
52	Yes	no	49	154	51	female	married	I don't smoke at all	Bachelor's	Yes	I do not experience pain in the areas mentioned above	sometimes	never	never	sometimes	never	never	sometimes	sometimes	sometimes	sometimes	never	sometimes	never	sometimes	sometimes	sometimes	sometimes	mostly	always	sometimes	never	sometimes	never	never	sometimes	no	no	no	no	no	no	no	no	no	no	7	1- Yes, to a simple extent	2- Yes, to a moderate extent
53	Yes	no	48	160	73	female	divorced	I don't smoke at all	Master's	Yes	Neck, shoulder, lower back, hip, thigh, knee	sometimes	mostly	Scarcely	Scarcely	mostly	mostly	sometimes	mostly	mostly	Scarcely	sometimes	mostly	mostly	sometimes	mostly	sometimes	sometimes	mostly	sometimes	mostly	Scarcely	mostly	sometimes	never	sometimes	Yes	no	Yes	no	Yes	no	no	no	no	Yes	9	3- Yes, to a large extent	0 = Not at all
54	Yes	no	57	158	84	female	married	I don't smoke at all	Master's	Yes	Lower back, hip, thigh, knee, ankle and foot	mostly	mostly	Scarcely	never	mostly	mostly	Scarcely	mostly	mostly	never	never	sometimes	Scarcely	never	mostly	never	sometimes	Scarcely	Scarcely	never	Scarcely	mostly	Scarcely	never	Scarcely	no	Yes	no	no	no	no	no	no	no	no	8	2- Yes, to a moderate extent	2- Yes, to a moderate extent
55	Yes	no	33	126	74	female	married	I don't smoke at all	secondary	Yes	Neck, lower back, knee	Scarcely	sometimes	Scarcely	sometimes	Scarcely	never	never	sometimes	Scarcely	sometimes	Scarcely	never	never	never	never	never	Scarcely	never	sometimes	never	Scarcely	Scarcely	never	never	never	no	no	no	no	Yes	no	Yes	no	Yes	Yes	8	1- Yes, to a simple extent	0 = Not at all
56	Yes	no	38	164	101	male	married	Former smoker	Bachelor's	Yes	knee	sometimes	mostly	mostly	mostly	sometimes	sometimes	sometimes	sometimes	Scarcely	Scarcely	sometimes	mostly	sometimes	Scarcely	Scarcely	sometimes	sometimes	never	Scarcely	never	Scarcely	Scarcely	never	never	never	no	no	no	no	no	no	no	no	no	no	6	1- Yes, to a simple extent	0 = Not at all
57	Yes	no	27	175	65	male	single	Currently a smoker	Bachelor's	Yes	the neck	sometimes	sometimes	sometimes	never	mostly	Scarcely	sometimes	Scarcely	never	never	never	Scarcely	sometimes	never	Scarcely	Scarcely	mostly	mostly	never	never	sometimes	Scarcely	Scarcely	Scarcely	never	no	no	no	no	no	no	no	no	no	no	4	1- Yes, to a simple extent	3- Yes, to a large extent
58	Yes	no	64	160	80	male	married	Former smoker	Master's	Yes	Hip and thigh	sometimes	sometimes	sometimes	sometimes	never	never	Scarcely	never	never	never	never	Scarcely	Scarcely	sometimes	sometimes	sometimes	Scarcely	Scarcely	mostly	never	mostly	Scarcely	Scarcely	never	Scarcely	no	no	no	no	no	no	no	no	no	no	7	0 = Not at all	0 = Not at all
59	Yes	no	51	160	94	female	married	I don't smoke at all	Bachelor's	Yes	lower back	sometimes	sometimes	sometimes	never	Scarcely	Scarcely	mostly	mostly	Scarcely	mostly	sometimes	sometimes	sometimes	Scarcely	mostly	sometimes	sometimes	Scarcely	never	never	sometimes	never	sometimes	never	never	no	no	no	no	no	no	Yes	no	no	no	5	3- Yes, to a large extent	2- Yes, to a moderate extent
60	Yes	no	28	147	59	female	divorced	Currently a smoker	Bachelor's	Yes	the neck	never	mostly	never	sometimes	mostly	never	never	never	never	never	never	Scarcely	never	never	sometimes	Scarcely	never	mostly	never	never	never	never	never	never	never	no	no	no	no	no	Yes	no	no	no	no	5	1- Yes, to a simple extent	0 = Not at all
61	Yes	no	40	162	88	female	married	I don't smoke at all	Bachelor's	Yes	Neck, shoulder, lower back, hip, thigh, knee	never	never	never	never	never	sometimes	never	never	sometimes	Scarcely	never	never	Scarcely	Scarcely	sometimes	Scarcely	never	never	never	never	never	sometimes	Scarcely	never	never	no	no	no	no	no	no	no	no	no	no	5	1- Yes, to a simple extent	1- Yes, to a simple extent
62	Yes	no	38	159	74	female	single	Currently a smoker	Bachelor's	Yes	knee	sometimes	Scarcely	never	never	never	never	never	Scarcely	never	never	never	never	Scarcely	never	sometimes	never	sometimes	sometimes	never	never	never	never	never	never	never	no	no	no	no	no	no	no	no	no	no	2	1- Yes, to a simple extent	0 = Not at all
63	Yes	no	62	160	96	female	Widower	I don't smoke at all	Bachelor's	Yes	knee	always	mostly	sometimes	never	Scarcely	sometimes	mostly	Scarcely	mostly	Scarcely	Scarcely	sometimes	sometimes	sometimes	always	mostly	mostly	sometimes	Scarcely	Scarcely	sometimes	mostly	Scarcely	never	sometimes	no	no	no	no	no	no	no	no	no	no	9	3- Yes, to a large extent	3- Yes, to a large extent
64	Yes	no	30	153	59	female	single	I don't smoke at all	Bachelor's	Yes	Lower back, hip and thigh	never	never	never	never	never	never	Scarcely	never	never	never	never	never	never	never	never	never	never	never	never	never	never	never	never	never	Scarcely	no	no	no	no	no	no	no	no	no	no	5	0 = Not at all	0 = Not at all
65	Yes	no	35	179	133	male	married	Currently a smoker	Bachelor's	Yes	lower back	Scarcely	Scarcely	never	never	never	never	never	Scarcely	never	never	never	never	never	Scarcely	Scarcely	never	Scarcely	never	never	never	never	never	Scarcely	never	never	no	no	no	no	no	no	no	no	no	no	6	1- Yes, to a simple extent	1- Yes, to a simple extent
66	Yes	no	50	152	62	female	married	I don't smoke at all	Bachelor's	Yes	lower back	sometimes	sometimes	sometimes	never	never	never	Scarcely	Scarcely	sometimes	sometimes	always	mostly	Scarcely	always	Scarcely	Scarcely	sometimes	sometimes	sometimes	sometimes	sometimes	always	sometimes	always	sometimes	no	no	no	no	no	no	no	no	no	no	5	1- Yes, to a simple extent	0 = Not at all
67	Yes	no	55	159	82	female	married	I don't smoke at all	Bachelor's	Yes	Neck, shoulder, knee	sometimes	sometimes	always	always	Scarcely	Scarcely	sometimes	Scarcely	sometimes	sometimes	Scarcely	mostly	Scarcely	always	sometimes	Scarcely	Scarcely	mostly	sometimes	Scarcely	Scarcely	mostly	Scarcely	never	never	no	no	no	no	no	no	no	no	no	no	7	2- Yes, to a moderate extent	3- Yes, to a large extent
68	Yes	no	23	157	95	female	single	I don't smoke at all	Bachelor's	Yes	Upper back, lower back	never	Scarcely	sometimes	sometimes	Scarcely	never	never	sometimes	never	never	never	never	never	never	never	never	never	never	never	never	never	never	never	never	never	no	no	no	no	no	no	no	no	no	no	10	1- Yes, to a simple extent	1- Yes, to a simple extent
69	Yes	no	44	156	103	female	married	I don't smoke at all	Bachelor's	Yes	knee	mostly	sometimes	Scarcely	Scarcely	sometimes	mostly	mostly	mostly	sometimes	always	mostly	mostly	mostly	sometimes	mostly	sometimes	mostly	sometimes	never	never	always	mostly	always	never	Scarcely	no	no	no	no	no	Yes	no	no	no	no	4	1- Yes, to a simple extent	0 = Not at all
70	Yes	no	54	166	90	male	married	I don't smoke at all	Bachelor's	Yes	Shoulder, knee	Scarcely	sometimes	Scarcely	Scarcely	Scarcely	never	Scarcely	sometimes	Scarcely	Scarcely	Scarcely	sometimes	Scarcely	never	Scarcely	never	Scarcely	sometimes	never	never	Scarcely	never	never	never	never	no	no	no	no	no	no	no	no	no	no	6	2- Yes, to a moderate extent	2- Yes, to a moderate extent
71	Yes	no	44	180	89	male	married	Currently a smoker	Bachelor's	Yes	Lower back, knee, ankle and foot	always	never	never	always	always	never	mostly	sometimes	mostly	sometimes	sometimes	always	sometimes	sometimes	always	always	sometimes	mostly	mostly	never	sometimes	always	sometimes	always	never	no	no	no	no	no	no	no	no	no	no	9	3- Yes, to a large extent	1- Yes, to a simple extent
72	Yes	no	52	168	82	male	married	Former smoker	Bachelor's	Yes	Neck, shoulder	sometimes	sometimes	sometimes	sometimes	sometimes	Scarcely	sometimes	Scarcely	Scarcely	Scarcely	Scarcely	Scarcely	never	sometimes	Scarcely	Scarcely	Scarcely	sometimes	never	never	Scarcely	never	Scarcely	Scarcely	never	no	no	no	no	no	no	no	no	no	no	5	1- Yes, to a simple extent	0 = Not at all
73	Yes	no	54	156	95	female	married	I don't smoke at all	Bachelor's	Yes	I do not experience pain in the areas mentioned above	sometimes	never	never	never	never	never	never	never	sometimes	sometimes	never	sometimes	never	sometimes	never	never	Scarcely	never	never	never	never	never	never	never	never	no	no	no	no	no	no	no	no	no	no	0	0 = Not at all	0 = Not at all
74	Yes	no	33	160	59	female	divorced	I don't smoke at all	Bachelor's	Yes	Neck, upper back, lower back	sometimes	Scarcely	sometimes	sometimes	sometimes	never	Scarcely	never	Scarcely	sometimes	sometimes	mostly	mostly	never	sometimes	Scarcely	Scarcely	mostly	never	always	always	sometimes	always	never	Scarcely	no	no	no	no	no	no	no	no	no	no	4	1- Yes, to a simple extent	2- Yes, to a moderate extent
75	Yes	no	36	154	50	female	divorced	Currently a smoker	Bachelor's	Yes	Shoulder, upper back	sometimes	sometimes	Scarcely	Scarcely	sometimes	Scarcely	Scarcely	sometimes	Scarcely	sometimes	never	sometimes	Scarcely	never	mostly	sometimes	sometimes	sometimes	never	mostly	always	sometimes	sometimes	mostly	sometimes	no	no	no	no	no	no	no	no	no	no	6	3- Yes, to a large extent	2- Yes, to a moderate extent
76	Yes	no	60	150	40	female	divorced	I don't smoke at all	middle	Yes	Lower back, knee	sometimes	sometimes	never	never	mostly	mostly	sometimes	sometimes	never	sometimes	mostly	mostly	mostly	never	never	sometimes	sometimes	mostly	sometimes	never	mostly	mostly	sometimes	never	mostly	no	no	no	no	no	no	no	Yes	no	no	3	1- Yes, to a simple extent	2- Yes, to a moderate extent
77	Yes	no	26	159	75	female	single	I don't smoke at all	Bachelor's	Yes	Shoulder, knee, ankle and foot	mostly	Scarcely	mostly	never	mostly	never	Scarcely	mostly	sometimes	Scarcely	sometimes	Scarcely	sometimes	Scarcely	sometimes	mostly	mostly	Scarcely	Scarcely	Scarcely	Scarcely	sometimes	sometimes	never	Scarcely	no	no	no	no	no	Yes	no	no	no	no	4	1- Yes, to a simple extent	0 = Not at all
78	Yes	no	34	169	54	male	married	Currently a smoker	secondary	Yes	Attached	sometimes	mostly	sometimes	mostly	never	never	mostly	mostly	never	sometimes	never	sometimes	mostly	never	Scarcely	sometimes	mostly	Scarcely	never	never	never	never	sometimes	never	never	no	no	no	no	Yes	no	no	no	no	Yes	3	0 = Not at all	0 = Not at all
79	Yes	no	30	167	72	male	married	Currently a smoker	Bachelor's	Yes	Hip, thigh, knee, ankle and foot	sometimes	never	Scarcely	never	never	never	mostly	never	never	never	sometimes	sometimes	Scarcely	Scarcely	never	never	never	never	Scarcely	Scarcely	never	Scarcely	never	Scarcely	mostly	no	no	no	no	no	no	no	no	no	no	1	1- Yes, to a simple extent	0 = Not at all
80	Yes	no	61	168	94	male	married	Currently a smoker	secondary	Yes	Shoulder, lower back, knee	sometimes	sometimes	mostly	never	always	Scarcely	sometimes	Scarcely	Scarcely	never	Scarcely	always	sometimes	sometimes	Scarcely	sometimes	sometimes	mostly	never	Scarcely	sometimes	mostly	sometimes	never	sometimes	no	no	no	no	no	no	no	no	no	no	4	2- Yes, to a moderate extent	0 = Not at all
81	Yes	no	27	156	59	female	married	Currently a smoker	Master's	Yes	lower back	always	mostly	never	mostly	never	never	never	sometimes	Scarcely	Scarcely	always	sometimes	always	never	sometimes	always	always	never	never	never	always	never	always	never	mostly	no	no	no	no	no	no	no	no	no	no	7	2- Yes, to a moderate extent	3- Yes, to a large extent
82	Yes	no	76	150	75	female	Widower	I don't smoke at all	Without education	Yes	knee	Scarcely	never	never	never	never	Scarcely	never	never	never	sometimes	never	never	never	never	never	never	never	never	never	never	never	never	never	never	never	no	no	no	no	no	no	no	no	no	no	7	1- Yes, to a simple extent	0 = Not at all
83	Yes	no	70	160	80	female	married	I don't smoke at all	Without education	Yes	Neck, shoulder, upper back, hip, thigh, knee	sometimes	always	mostly	never	sometimes	sometimes	Scarcely	mostly	mostly	mostly	Scarcely	sometimes	Scarcely	mostly	mostly	mostly	mostly	always	Scarcely	Scarcely	Scarcely	sometimes	Scarcely	Scarcely	Scarcely	no	no	no	no		Yes	no	no	no	no	8	2- Yes, to a moderate extent	1- Yes, to a simple extent
84	Yes	no	34	163	89	female	single	I don't smoke at all	Master's	Yes	knee	sometimes	sometimes	never	never	Scarcely	Scarcely	sometimes	Scarcely	never	sometimes	never	sometimes	Scarcely	never	never	never	Scarcely	Scarcely	never	never	never	never	never	never	never	no	no	no	no	no	no	no	no	no	no	9	1- Yes, to a simple extent	2- Yes, to a moderate extent
85	Yes	no	28	167	88	female	single	I don't smoke at all	Bachelor's	Yes	the shoulder	sometimes	Scarcely	never	never	Scarcely	never	sometimes	Scarcely	sometimes	Scarcely	never	mostly	sometimes	never	sometimes	Scarcely	mostly	mostly	sometimes	sometimes	mostly	sometimes	mostly	sometimes	sometimes	no	no	no	no	no	no	no	no	no	Yes	7	1- Yes, to a simple extent	1- Yes, to a simple extent
86	Yes	no	55	127	98	female	married	I don't smoke at all	Bachelor's	Yes	knee	mostly	sometimes	Scarcely	never	sometimes	mostly	sometimes	mostly	mostly	Scarcely	Scarcely	sometimes	Scarcely	Scarcely	mostly	Scarcely	sometimes	never	never	never	Scarcely	Scarcely	Scarcely	never	never	no	no	no	no	no	no	no	no	no	no	9	1- Yes, to a simple extent	1- Yes, to a simple extent
87	Yes	no	50	155	75	female	married	I don't smoke at all	Bachelor's	Yes	Wrist/palm, ankle and foot	mostly	mostly	sometimes	never	never	mostly	never	mostly	Scarcely	sometimes	sometimes	sometimes	never	sometimes	sometimes	sometimes	sometimes	sometimes	never	never	sometimes	sometimes	Scarcely	sometimes	never	no	no	no	no	no	no	no	no	Yes	no	5	0 = Not at all	1- Yes, to a simple extent
88	Yes	no	50	150	96	female	married	I don't smoke at all	middle	Yes	Neck, shoulder, lower back, wrist/palm, ankle and foot	mostly	sometimes	never	Scarcely	never	sometimes	mostly	sometimes	mostly	never	Scarcely	sometimes	sometimes	never	sometimes	mostly	mostly	mostly	never	sometimes	Scarcely	sometimes	sometimes	never	mostly	no	no	no	no	no	no	no	no	no	no	10	2- Yes, to a moderate extent	2- Yes, to a moderate extent
89	Yes	no	55	159	81	female	married	I don't smoke at all	Without education	Yes	lower back	mostly	sometimes	mostly	Scarcely	mostly	mostly	sometimes	sometimes	always	always	mostly	mostly	mostly	never	mostly	mostly	mostly	sometimes	never	never	always	sometimes	sometimes	Scarcely	Scarcely	no	no	no	no	Yes	no	no	no	Yes	no	8	3- Yes, to a large extent	3- Yes, to a large extent
90	Yes	no	25	158	90	female	married	I don't smoke at all	middle	Yes	Upper back, lower back	Scarcely	sometimes	never	Scarcely	sometimes	never	never	never	never	sometimes	Scarcely	Scarcely	always	never	never	sometimes	always	never	Scarcely	Scarcely	sometimes	Scarcely	sometimes	Scarcely	always	no	no	no	no	Yes	Yes	no	no	Yes	Yes	5	1- Yes, to a simple extent	0 = Not at all
91	Yes	no	53	157	85	female	divorced	I don't smoke at all	middle	Yes	Neck, shoulder, lower back, elbow, wrist/palm, hip, thigh, knee, ankle and foot	sometimes	sometimes	sometimes	never	mostly	sometimes	Scarcely	sometimes	sometimes	mostly	Scarcely	mostly	Scarcely	never	sometimes	Scarcely	sometimes	always	never	sometimes	Scarcely	mostly	Scarcely	never	Scarcely	Yes	no	no	no	Yes	no	no	no	no	no	8	2- Yes, to a moderate extent	3- Yes, to a large extent
92	Yes	no	34	173	73	male	married	I don't smoke at all	Bachelor's	Yes	knee	sometimes	Scarcely	never	never	Scarcely	Scarcely	never	sometimes	Scarcely	never	never	Scarcely	never	never	mostly	never	never	sometimes	never	never	never	never	sometimes	never	never	no	no	no	no	no	no	no	no	no	no	6	2- Yes, to a moderate extent	1- Yes, to a simple extent
93	Yes	no	65	152	78	female	Widower	I don't smoke at all	primary	Yes	Neck, shoulder, knee, ankle and foot	mostly	sometimes	mostly	never	mostly	sometimes	sometimes	sometimes	mostly	sometimes	sometimes	sometimes	sometimes	never	mostly	sometimes	mostly	mostly	sometimes	never	Scarcely	sometimes	sometimes	never	mostly	no	no	no	no	no	no	no	no	no	no	8	2- Yes, to a moderate extent	2- Yes, to a moderate extent
94	Yes	no	45	168	114	female	married	I don't smoke at all	Without education	Yes	Lower back, ankle and foot	mostly	always	Scarcely	never	never	always	Scarcely	always	always	Scarcely	sometimes	sometimes	Scarcely	mostly	always	Scarcely	always	mostly	never	never	mostly	sometimes	Scarcely	never	mostly	Yes	Yes	no	no	no	no	no	no	no	no	8	4- Yes, at all times	3- Yes, to a large extent
95	Yes	no	32	160	81	female	single	I don't smoke at all	primary	Yes	Knee, ankle and foot	mostly	never	sometimes	never	mostly	never	never	sometimes	sometimes	mostly	never	never	never	never	mostly	never	never	never	never	mostly	Scarcely	sometimes	never	mostly	never	no	no	no	no	Yes	Yes	no	no	no	Yes	0	3- Yes, to a large extent	2- Yes, to a moderate extent
96	Yes	no	22	166	75	female	single	I don't smoke at all	Bachelor's	Yes	Neck, upper back, lower back, hip, thigh, knee	sometimes	mostly	Scarcely	mostly	sometimes	always	always	sometimes	always	sometimes	Scarcely	always	always	always	always	sometimes	mostly	sometimes	never	mostly	always	always	always	never	Scarcely	no	no	no	no	no	Yes	no	no	no	no	8	3- Yes, to a large extent	3- Yes, to a large extent
97	Yes	no	35	168	110	female	married	I don't smoke at all	middle	Yes	knee	sometimes	mostly	never	never	never	never	never	mostly	mostly	Scarcely	sometimes	mostly	always	never	never	always	always	sometimes	never	never	never	sometimes	never	mostly	always	no	no	no	no	no	no	no	no	no	no	4	2- Yes, to a moderate extent	0 = Not at all
98	Yes	no	30	155	55	female	married	I don't smoke at all	secondary	Yes	Wrist/palm	sometimes	sometimes	Scarcely	never	Scarcely	sometimes	Scarcely	never	Scarcely	mostly	never	mostly	sometimes	sometimes	Scarcely	never	Scarcely	never	never	Scarcely	Scarcely	never	Scarcely	never	Scarcely	no	no	no	no	no	no	no	no	no	no	6	0 = Not at all	0 = Not at all
99	Yes	no	50	155	73	female	divorced	I don't smoke at all	secondary	Yes	Neck, Shoulder, Upper Back, Lower Back, Elbow, Wrist/Palm, Hip & Thigh, Knee, Ankle & Foot	always	always	always	always	always	always	Scarcely	Scarcely	always	sometimes	always	sometimes	always	always	always	mostly	always	always	always	never	sometimes	always	mostly	never	always	no	Yes	no	no	Yes	Yes	no	no	Yes	Yes	9	3- Yes, to a large extent	3- Yes, to a large extent
100	Yes	no	28	170	115	male	single	Currently a smoker	Bachelor's	Yes	I do not experience pain in the areas mentioned above	sometimes	Scarcely	mostly	sometimes	always	never	Scarcely	mostly	mostly	sometimes	mostly	always	always	always	always	mostly	always	mostly	sometimes	mostly	always	Scarcely	always	always	mostly	no	no	no	no	no	Yes	no	no	no	Yes	10	2- Yes, to a moderate extent	3- Yes, to a large extent
101	Yes	no	38	160	77	female	married	I don't smoke at all	Bachelor's	Yes	Neck, lower back, knee	Scarcely	sometimes	sometimes	never	Scarcely	never	mostly	never	sometimes	mostly	never	sometimes	never	Scarcely	mostly	sometimes	sometimes	mostly	never	mostly	Scarcely	Scarcely	mostly	never	never	no	no	no	no	no	no	no	no	no	no	3	2- Yes, to a moderate extent	0 = Not at all
102	Yes	no	55	160	120	female	divorced	I don't smoke at all	Bachelor's	Yes	Neck, lower back, knee	mostly	sometimes	Scarcely	never	Scarcely	never	Scarcely	Scarcely	Scarcely	mostly	sometimes	never	sometimes	sometimes	mostly	sometimes	sometimes	sometimes	Scarcely	Scarcely	Scarcely	Scarcely	sometimes	never	sometimes	no	no	no	no	no	no	no	no	no	no	8	0 = Not at all	1- Yes, to a simple extent
103	Yes	no	35	170	95	female	divorced	I don't smoke at all	primary	Yes	knee	sometimes	always	never	never	mostly	never	never	never	mostly	always	never	always	mostly	Scarcely	never	never	never	sometimes	Scarcely	Scarcely	never	never	sometimes	never	never	no	no	no	no	Yes	Yes	no	no	no	no	4	1- Yes, to a simple extent	1- Yes, to a simple extent
104	Yes	no	27	148	49	female	single	I don't smoke at all	Bachelor's	Yes	Neck, ankle and foot	mostly	sometimes	mostly	Scarcely	sometimes	Scarcely	Scarcely	Scarcely	Scarcely	Scarcely	Scarcely	mostly	sometimes	Scarcely	mostly	sometimes	sometimes	sometimes	Scarcely	Scarcely	Scarcely	sometimes	sometimes	Scarcely	Scarcely	no	no	no	no	no	no	no	no	no	no	7	2- Yes, to a moderate extent	1- Yes, to a simple extent
105	Yes	no	29	165	90	female	single	I don't smoke at all	Bachelor's	Yes	Upper back, lower back	sometimes	sometimes	never	never	mostly	never	sometimes	never	never	Scarcely	never	Scarcely	Scarcely	never	Scarcely	Scarcely	Scarcely	sometimes	never	Scarcely	Scarcely	Scarcely	Scarcely	Scarcely	mostly	no	no	no	no	no	Yes	no	no	no	no	9	0 = Not at all	1- Yes, to a simple extent
106	Yes	no	48	150	62	female	married	I don't smoke at all	Bachelor's	Yes	the shoulder	mostly	Scarcely	sometimes	never	always	always	mostly	always	Scarcely	sometimes	never	sometimes	Scarcely	Scarcely	sometimes	Scarcely	Scarcely	sometimes	never	mostly	Scarcely	Scarcely	mostly	mostly	Scarcely	no	no	no	no	no	no	no	no	no	no	7	4- Yes, at all times	2- Yes, to a moderate extent
107	Yes	no	27	163	74	female	single	I don't smoke at all	secondary	Yes	Neck, shoulder, upper back, elbow, wrist/palm	sometimes	always	Scarcely	sometimes	always	always	sometimes	always	always	sometimes	sometimes	Scarcely	sometimes	Scarcely	always	sometimes	always	always	never	mostly	never	mostly	always	never	sometimes	no	no	no	no	no	no	no	no	no	no	10	3- Yes, to a large extent	2- Yes, to a moderate extent
108	Yes	no	30	175	83	male	single	Currently a smoker	Bachelor's	Yes	lower back	sometimes	sometimes	never	never	mostly	never	mostly	mostly	sometimes	never	never	mostly	never	Scarcely	never	never	never	never	never	always	mostly	Scarcely	Scarcely	never	never	no	no	no	no	no	no	no	no	no	no	7	2- Yes, to a moderate extent	0 = Not at all
109	Yes	no	48	147	100	male	divorced	Currently a smoker	Bachelor's	Yes	Upper back, knee	always	sometimes	always	always	sometimes	sometimes	mostly	mostly	Scarcely	sometimes	sometimes	sometimes	sometimes	sometimes	mostly	mostly	sometimes	Scarcely	mostly	Scarcely	always	never	sometimes	sometimes	Scarcely	no	no	no	no	no	no	no	no	no	no	7	4- Yes, at all times	4- Yes, at all times
110	Yes	no	22	165	70	female	single	I don't smoke at all	Bachelor's	Yes	Wrist/palm	sometimes	sometimes	always	sometimes	never	never	sometimes	mostly	sometimes	Scarcely	never	mostly	mostly	never	Scarcely	sometimes	sometimes	mostly	sometimes	always	never	always	always	mostly	never	no	no	no	no	no	no	no	no	no	no	6	1- Yes, to a simple extent	3- Yes, to a large extent
111	Yes	no	62	158	91	female	married	I don't smoke at all	Without education	Yes	Neck, upper back, lower back, wrist/palm, knee	mostly	mostly	never	never	never	mostly	Scarcely	mostly	mostly	never	never	mostly	never	never	Scarcely	never	sometimes	mostly	mostly	never	mostly	mostly	never	never	never	no	no	no	Yes	no	no	no	no	no	no	10	2- Yes, to a moderate extent	2- Yes, to a moderate extent
112	Yes	no	70	151	62	female	Widower	I don't smoke at all	primary	Yes	knee	sometimes	sometimes	never	never	sometimes	sometimes	never	mostly	mostly	Scarcely	Scarcely	Scarcely	Scarcely	Scarcely	Scarcely	never	sometimes	sometimes	Scarcely	never	mostly	sometimes	always	sometimes	sometimes	no	no	no	no	no	no	no	no	no	no	4	1- Yes, to a simple extent	1- Yes, to a simple extent
113	Yes	no	61	132	80	female	Widower	I don't smoke at all	Without education	Yes	knee	sometimes	sometimes	sometimes	sometimes	sometimes	sometimes	sometimes	sometimes	sometimes	sometimes	sometimes	sometimes	sometimes	sometimes	sometimes	sometimes	sometimes	sometimes	mostly	mostly	always	always	always	sometimes	mostly	no	no	no	no	no	no	no	no	no	no	8	2- Yes, to a moderate extent	2- Yes, to a moderate extent
114	Yes	no	54	158	70	female	married	I don't smoke at all	Without education	Yes	Lower back, hip, thigh, knee, ankle and foot	mostly	sometimes	mostly	never	sometimes	Scarcely	never	Scarcely	sometimes	Scarcely	Scarcely	sometimes	mostly	sometimes	Scarcely	sometimes	sometimes	never	never	never	mostly	sometimes	Scarcely	Scarcely	mostly	no	no	no	no	no	no	no	no	no	no	10	4- Yes, at all times	3- Yes, to a large extent
115	Yes	no	53	151	135	female	divorced	I don't smoke at all	middle	Yes	Lower back, elbow, wrist/palm, hip, thigh, knee, ankle and foot	always	always	always	never	mostly	always	always	always	always	always	always	always	mostly	mostly	always	sometimes	always	sometimes	never	always	always	always	sometimes	sometimes	always	Yes	Yes	Yes	no	Yes	Yes	Yes	Yes	Yes	Yes	10	3- Yes, to a large extent	4- Yes, at all times
116	Yes	no	50	128	80	female	divorced	I don't smoke at all	Bachelor's	Yes	Lower back, hip, thigh, knee	mostly	mostly	Scarcely	never	never	mostly	sometimes	mostly	sometimes	sometimes	sometimes	mostly	mostly	sometimes	mostly	sometimes	mostly	never	never	never	sometimes	sometimes	Scarcely	never	Scarcely	no	no	no	no	no	no	no	no	no	no	10	1- Yes, to a simple extent	2- Yes, to a moderate extent
117	Yes	no	36	149	79	female	married	I don't smoke at all	secondary	Yes	Ankle and foot	Scarcely	never	sometimes	never	Scarcely	Scarcely	never	never	Scarcely	sometimes	sometimes	never	sometimes	sometimes	Scarcely	sometimes	sometimes	never	mostly	never	never	never	sometimes	never	sometimes	no	no	no	no	no	no	no	no	no	Yes	3	2- Yes, to a moderate extent	1- Yes, to a simple extent
118	Yes	no	50	160	89	female	divorced	I don't smoke at all	Without education	Yes	Neck, shoulder, lower back, hip, thigh, knee, ankle and foot	always	mostly	sometimes	never	never	always	always	always	always	never	never	never	mostly	mostly	sometimes	never	always	mostly	never	mostly	always	always	sometimes	Scarcely	mostly	no	no	no	no	no	no	no	no	no	no	10	1- Yes, to a simple extent	3- Yes, to a large extent
119	Yes	no	28	150	45	female	married	I don't smoke at all	Bachelor's	Yes	Neck, lower back	sometimes	Scarcely	sometimes	Scarcely	Scarcely	sometimes	Scarcely	sometimes	Scarcely	Scarcely	never	sometimes	Scarcely	never	Scarcely	never	Scarcely	sometimes	never	never	never	Scarcely	never	never	never	no	no	no	no	no	no	no	no	no	no	2	0 = Not at all	0 = Not at all
120	Yes	no	27	162	85	female	single	I don't smoke at all	Bachelor's	Yes	lower back	sometimes	mostly	Scarcely	never	always	never	never	Scarcely	sometimes	Scarcely	never	never	never	sometimes	sometimes	never	sometimes	never	never	always	never	Scarcely	Scarcely	never	Scarcely	no	no	no	no	no	no	no	no	Yes	no	3	1- Yes, to a simple extent	0 = Not at all
121	Yes	no	31	159	60	female	married	I don't smoke at all	Bachelor's	Yes	Neck, shoulder, lower back, knee	sometimes	sometimes	sometimes	Scarcely	Scarcely	Scarcely	Scarcely	sometimes	sometimes	mostly	Scarcely	sometimes	Scarcely	sometimes	Scarcely	sometimes	Scarcely	sometimes	never	sometimes	Scarcely	Scarcely	sometimes	sometimes	Scarcely	no	no	no	no	Yes	no	no	no	Yes	no	5	2- Yes, to a moderate extent	1- Yes, to a simple extent
122	Yes	no	35	163	64	female	married	I don't smoke at all	Bachelor's	Yes	lower back	mostly	mostly	always	never	mostly	never	always	mostly	mostly	sometimes	Scarcely	sometimes	always	Scarcely	mostly	mostly	mostly	mostly	Scarcely	Scarcely	Scarcely	sometimes	mostly	never	mostly	no	no	no	no	no	Yes	no	no	Yes	Yes	8	3- Yes, to a large extent	3- Yes, to a large extent
123	Yes	no	30	155	95	female	divorced	I don't smoke at all	Bachelor's	Yes	Ankle and foot	mostly	sometimes	always	always	Scarcely	always	always	always	sometimes	sometimes	mostly	always	mostly	always	sometimes	always	always	sometimes	never	always	Scarcely	sometimes	sometimes	always	sometimes	no	no	no	no	Yes	no	no	no	no	no	5	4- Yes, at all times	2- Yes, to a moderate extent
124	Yes	no	22	157	43	female	single	I don't smoke at all	Bachelor's	Yes	Hip, thigh, knee, ankle and foot	mostly	mostly	sometimes	never	sometimes	sometimes	mostly	mostly	sometimes	Scarcely	sometimes	mostly	mostly	never	mostly	always	mostly	Scarcely	never	mostly	sometimes	always	sometimes	sometimes	Scarcely	no	Yes	Yes	no	no	no	no	no	Yes	Yes	8	4- Yes, at all times	4- Yes, at all times
125	Yes	no	45	155	65	female	married	I don't smoke at all	Bachelor's	Yes	Ankle and foot	sometimes	sometimes	never	never	sometimes	sometimes	Scarcely	never	Scarcely	mostly	never	Scarcely	never	never	mostly	never	sometimes	sometimes	never	sometimes	Scarcely	sometimes	sometimes	never	never	no	no	no	no	no	no	no	no	no	no	6	2- Yes, to a moderate extent	2- Yes, to a moderate extent
126	Yes	no	39	159	67	female	married	I don't smoke at all	Bachelor's	Yes	lower back	mostly	mostly	mostly	never	never	sometimes	mostly	Scarcely	mostly	sometimes	sometimes	sometimes	mostly	mostly	mostly	mostly	mostly	sometimes	sometimes	mostly	sometimes	sometimes	mostly	sometimes	mostly	no	no	no	no	Yes	no	Yes	no	Yes	no	8	2- Yes, to a moderate extent	2- Yes, to a moderate extent
127	Yes	no	30	161	59	female	single	I don't smoke at all	Bachelor's	Yes	knee	Scarcely	sometimes	sometimes	sometimes	sometimes	never	never	never	never	sometimes	never	Scarcely	Scarcely	never	Scarcely	Scarcely	never	sometimes	never	Scarcely	never	never	never	Scarcely	never	no	no	no	no	no	Yes	no	no	no	no	4	1- Yes, to a simple extent	0 = Not at all
128	Yes	no	63	165	75	male	married	Currently a smoker	secondary	Yes	lower back	never	sometimes	Scarcely	never	never	never	sometimes	never	never	Scarcely	never	never	Scarcely	never	never	never	Scarcely	sometimes	never	never	never	never	never	never	never	no	no	no	no	no	no	no	no	no	no	7	1- Yes, to a simple extent	1- Yes, to a simple extent
129	Yes	no	27	165	100	male	single	Former smoker	Bachelor's	Yes	upper back	mostly	sometimes	never	never	never	never	sometimes	Scarcely	never	sometimes	never	sometimes	never	never	sometimes	Scarcely	sometimes	sometimes	never	never	sometimes	never	Scarcely	never	never	no	no	no	no	no	no	no	no	no	no	7	2- Yes, to a moderate extent	0 = Not at all
130	Yes	no	32	170	88	male	married	Former smoker	Bachelor's	Yes	Lower back, hip and thigh	sometimes	sometimes	sometimes	never	never	Scarcely	sometimes	Scarcely	never	sometimes	sometimes	sometimes	Scarcely	Scarcely	Scarcely	Scarcely	sometimes	never	Scarcely	mostly	sometimes	mostly	Scarcely	never	never	no	no	no	no	no	no	no	no	no	no	6	2- Yes, to a moderate extent	0 = Not at all
131	Yes	no	70	155	49	female	single	I don't smoke at all	middle	Yes	knee	mostly	always	Scarcely	Scarcely	never	mostly	Scarcely	mostly	always	Scarcely	sometimes	Scarcely	sometimes	never	mostly	sometimes	mostly	mostly	Scarcely	sometimes	Scarcely	mostly	mostly	never	sometimes	no	no	no	no	no	no	no	no	no	no	8	3- Yes, to a large extent	3- Yes, to a large extent
132	Yes	no	76	152	68	female	divorced	I don't smoke at all	primary	Yes	knee	Scarcely	mostly	sometimes	never	Scarcely	Scarcely	sometimes	never	Scarcely	Scarcely	Scarcely	never	Scarcely	mostly	Scarcely	sometimes	never	Scarcely	mostly	never	sometimes	never	sometimes	mostly	never	no	no	no	no	no	Yes	no	no	no	no	8	2- Yes, to a moderate extent	1- Yes, to a simple extent
133	Yes	no	22	157	54	female	single	I don't smoke at all	Bachelor's	Yes	Neck, shoulder, upper back	mostly	always	sometimes	mostly	Scarcely	never	mostly	always	mostly	sometimes	never	never	mostly	always	always	always	always	always	Scarcely	Scarcely	sometimes	Scarcely	sometimes	never	sometimes	no	no	no	no	no	Yes	no	no	no	no	8	2- Yes, to a moderate extent	1- Yes, to a simple extent
134	Yes	no	87	167	93	female	single	I don't smoke at all	middle	Yes	Ankle and foot	sometimes	sometimes	Scarcely	never	sometimes	never	sometimes	Scarcely	Scarcely	sometimes	never	Scarcely	Scarcely	sometimes	Scarcely	Scarcely	Scarcely	Scarcely	Scarcely	Scarcely	Scarcely	never	Scarcely	never	Scarcely	no	no	no	no	no	no	no	no	no	no	4	1- Yes, to a simple extent	0 = Not at all
135	Yes	no	48	164	67	female	married	I don't smoke at all	secondary	Yes	knee	mostly	mostly	sometimes	mostly	Scarcely	sometimes	sometimes	mostly	mostly	Scarcely	Scarcely	mostly	sometimes	mostly	sometimes	Scarcely	Scarcely	Scarcely	never	mostly	sometimes	mostly	sometimes	never	never	no	no	no	no	no	no	no	no	no	no	10	1- Yes, to a simple extent	0 = Not at all
136	Yes	no	41	155	72	female	married	I don't smoke at all	secondary	Yes	Shoulder, hip and thigh	sometimes	mostly	sometimes	never	mostly	never	never	never	sometimes	sometimes	sometimes	mostly	Scarcely	never	sometimes	sometimes	sometimes	sometimes	never	sometimes	Scarcely	mostly	sometimes	never	never	no	no	no	no	no	Yes	no	no	no	no	6	2- Yes, to a moderate extent	3- Yes, to a large extent
137	Yes	no	73	168	87	male	married	Currently a smoker	Bachelor's	Yes	knee	sometimes	Scarcely	never	never	never	never	never	sometimes	sometimes	never	never	Scarcely	never	sometimes	sometimes	never	never	never	never	never	sometimes	never	never	never	sometimes	no	no	no	no	no	no	no	no	no	no	3	0 = Not at all	0 = Not at all
138	Yes	no	30	167	71	female	married	I don't smoke at all	Master's	Yes	Neck, shoulder, knee	sometimes	sometimes	sometimes	sometimes	Scarcely	never	sometimes	sometimes	sometimes	Scarcely	never	never	Scarcely	always	sometimes	Scarcely	Scarcely	mostly	mostly	mostly	sometimes	never	Scarcely	never	never	no	no	no	no	0	0	0	no	no	no	5	2- Yes, to a moderate extent	1- Yes, to a simple extent
139	Yes	no	77	156	120	female	Widower	I don't smoke at all	Without education	Yes	Shoulder, upper back	mostly	mostly	mostly	Scarcely	sometimes	sometimes	never	mostly	mostly	sometimes	sometimes	mostly	sometimes	sometimes	sometimes	sometimes	sometimes	mostly	Scarcely	Scarcely	sometimes	mostly	sometimes	Scarcely	sometimes	no	no	no	no	no	no	no	no	no	no	8	3- Yes, to a large extent	2- Yes, to a moderate extent
140	Yes	no	33	160	85	male	married	Currently a smoker	Master's	Yes	lower back	sometimes	sometimes	never	never	never	sometimes	never	never	never	Scarcely	never	never	never	never	never	never	never	never	never	never	never	sometimes	never	Scarcely	Scarcely	no	no	no	no	no	no	no	no	no	no	6	0 = Not at all	0 = Not at all
141	Yes	no	29	175	82	male	single	Currently a smoker	Bachelor's	Yes	Attached	Scarcely	Scarcely	never	never	mostly	never	Scarcely	Scarcely	Scarcely	never	never	sometimes	never	Scarcely	sometimes	never	Scarcely	sometimes	never	always	mostly	sometimes	sometimes	never	never	no	no	no	no	no	no	no	no	no	no	8	1- Yes, to a simple extent	0 = Not at all
142	Yes	no	62	152	54	female	married	I don't smoke at all	Master's	Yes	Neck, shoulder, hip and thigh	Scarcely	sometimes	never	sometimes	never	never	never	Scarcely	Scarcely	Scarcely	sometimes	Scarcely	sometimes	never	Scarcely	never	sometimes	sometimes	Scarcely	never	sometimes	sometimes	sometimes	Scarcely	Scarcely	no	no	no	no	no	no	no	no	no	no	6	1- Yes, to a simple extent	0 = Not at all
143	Yes	no	54	157	89	female	married	I don't smoke at all	Ph.D	Yes	Lower back, elbow, knee	mostly	sometimes	sometimes	Scarcely	never	sometimes	Scarcely	mostly	sometimes	sometimes	sometimes	sometimes	sometimes	Scarcely	mostly	sometimes	sometimes	sometimes	Scarcely	sometimes	mostly	mostly	sometimes	never	sometimes	no	no	no	no	Yes	Yes	no	no	no	no	6	1- Yes, to a simple extent	1- Yes, to a simple extent
144	Yes	no	48	160	90	female	married	I don't smoke at all	Without education	Yes	Upper back, knee	sometimes	mostly	sometimes	never	Scarcely	sometimes	mostly	mostly	mostly	mostly	sometimes	Scarcely	sometimes	never	mostly	sometimes	Scarcely	never	never	never	never	always	never	never	Scarcely	no	no	no	no	Yes	no	no	no	no	no	9	4- Yes, at all times	2- Yes, to a moderate extent
145	Yes	no	28	165	50	female	divorced	I don't smoke at all	Master's	Yes	lower back	sometimes	Scarcely	Scarcely	never	mostly	Scarcely	sometimes	never	Scarcely	sometimes	Scarcely	Scarcely	never	Scarcely	sometimes	Scarcely	Scarcely	Scarcely	sometimes	Scarcely	never	Scarcely	sometimes	sometimes	never	no	no	no	no	no	no	no	no	no	no	5	1- Yes, to a simple extent	1- Yes, to a simple extent
146	Yes	no	36	160	57	female	married	I don't smoke at all	Bachelor's		the neck	mostly	sometimes	mostly	never	mostly	mostly	never	mostly	always	always	mostly	always	mostly	mostly	always	always	mostly	always	always	Scarcely	sometimes	sometimes	mostly	Scarcely	mostly	no	no	no	no	no	Yes	no	no	no	no	10	1- Yes, to a simple extent	2- Yes, to a moderate extent
147	Yes	no	62	150	111	female	married	I don't smoke at all	Without education		Upper back, lower back, wrist/palm, ankle and foot	sometimes	always	never	never	never	mostly	never	Scarcely	sometimes	sometimes	mostly	mostly	mostly	mostly	mostly	mostly	mostly	mostly	never	sometimes	mostly	mostly	never	never	sometimes	no	no	no	no	no	no	no	no	no	no	6	1- Yes, to a simple extent	2- Yes, to a moderate extent
148	Yes	no	49	155	73	female	married	I don't smoke at all	Bachelor's		lower back	sometimes	Scarcely	never	sometimes	never	never	sometimes	sometimes	sometimes	Scarcely	never	never	sometimes	mostly	sometimes	mostly	mostly	Scarcely	never	sometimes	never	Scarcely	always	always	never	no	no	no	no	Yes	Yes	no	no	no	no	4	1- Yes, to a simple extent	1- Yes, to a simple extent
149	Yes	no	51	157	82	female	Widower	I don't smoke at all	Without education		Hip and thigh	Scarcely	always	Scarcely	sometimes	sometimes	always	Scarcely	Scarcely	Scarcely	sometimes	never	always	always	always	always	never	always	always	never	never	always	always	always	never	never	no	no	no	no	no	Yes	no	no	no	no	0	1- Yes, to a simple extent	0 = Not at all
150	Yes	no	20	120	70	female	single	I don't smoke at all	Bachelor's		Neck, shoulder, lower back	sometimes	mostly	sometimes	never	mostly	never	always	Scarcely	sometimes	always	sometimes	never	sometimes	sometimes	mostly	mostly	mostly	mostly	mostly	sometimes	never	never	sometimes	never	never	no	no	no	no	no	no	no	no	no	no	8	0 = Not at all	0 = Not at all
151	Yes	no	70	162	69	female	Widower	I don't smoke at all	Without education		knee	mostly	mostly	sometimes	never	Scarcely	sometimes	mostly	Scarcely	mostly	never	Scarcely	mostly	sometimes	never	mostly	Scarcely	mostly	mostly	Scarcely	never	sometimes	never	never	never	mostly	no	no	no	no	no	no	no	no	no	no	9	2- Yes, to a moderate extent	3- Yes, to a large extent
152	Yes	no	34	163	59	female	married	I don't smoke at all	Bachelor's		upper back	sometimes	Scarcely	sometimes	mostly	Scarcely	never	never	Scarcely	Scarcely	sometimes	Scarcely	sometimes	Scarcely	never	Scarcely	Scarcely	never	Scarcely	sometimes	Scarcely	Scarcely	Scarcely	Scarcely	Scarcely	never	no	no	no	no	no	no	no	no	no	no	3	0 = Not at all	1- Yes, to a simple extent
153	Yes	no	27	167	55	male	single	Former smoker	Bachelor's		I do not experience pain in the areas mentioned above	sometimes	Scarcely	always	sometimes	always	Scarcely	always	mostly	Scarcely	mostly	sometimes	mostly	mostly	mostly	mostly	mostly	sometimes	sometimes	mostly	Scarcely	always	Scarcely	mostly	always	mostly	no	no	no	no	no	no	no	no	no	no	8	2- Yes, to a moderate extent	2- Yes, to a moderate extent
154	Yes	no	59	168	98	male	married	Currently a smoker	secondary		knee	sometimes	sometimes	never	never	never	sometimes	sometimes	sometimes	sometimes	never	never	sometimes	sometimes	sometimes	sometimes	sometimes	sometimes	sometimes	never	sometimes	Scarcely	sometimes	sometimes	Scarcely	sometimes	no	no	no	no	no	no	no	no	no	no	5	1- Yes, to a simple extent	1- Yes, to a simple extent
155	Yes	no	26	163	58	female	single	I don't smoke at all	Bachelor's		Knee, ankle and foot	never	never	mostly	sometimes	Scarcely	Scarcely	Scarcely	sometimes	sometimes	Scarcely	never	never	Scarcely	Scarcely	Scarcely	never	Scarcely	Scarcely	never	never	never	Scarcely	never	never	Scarcely	no	no	no	no	no	no	no	no	no	no	5	0 = Not at all	0 = Not at all
156	Yes	no	62	157	48	female	married	I don't smoke at all	Without education		knee	mostly	mostly	Scarcely	never	sometimes	sometimes	never	sometimes	mostly	never	sometimes	sometimes	Scarcely	Scarcely	mostly	sometimes	never	mostly	never	never	sometimes	never	never	Scarcely	sometimes	no	no	no	no	no	no	no	no	no	no	10	2- Yes, to a moderate extent	1- Yes, to a simple extent
157	Yes	no	63	143	59	female	married	I don't smoke at all	Without education		knee	sometimes	mostly	Scarcely	never	sometimes	sometimes	never	sometimes	sometimes	Scarcely	never	Scarcely	never	sometimes	mostly	Scarcely	never	sometimes	never	never	never	never	never	never	Scarcely	no	no	no	no	no	no	no	no	no	no	8	3- Yes, to a large extent	2- Yes, to a moderate extent
158	Yes	no	39	168	54	female	married	I don't smoke at all	secondary		lower back	sometimes	mostly	sometimes	never	never	Scarcely	never	never	sometimes	Scarcely	never	mostly	never	never	sometimes	sometimes	never	sometimes	never	Scarcely	never	never	never	never	never	no	no	no	no	no	no	no	no	no	no	9	1- Yes, to a simple extent	0 = Not at all
159	Yes	no	65	156	80	female	divorced	I don't smoke at all	Without education		knee	mostly	mostly	sometimes	Scarcely	sometimes	mostly	sometimes	mostly	mostly	Scarcely	Scarcely	sometimes	Scarcely	Scarcely	mostly	Scarcely	never	mostly	Scarcely	never	sometimes	sometimes	Scarcely	never	sometimes	no	no	no	no	no	Yes	no	no	no	no	7	3- Yes, to a large extent	2- Yes, to a moderate extent
160	Yes	no	71	169	94	female	married	Former smoker	Bachelor's		Hip, thigh, knee	sometimes	sometimes	Scarcely	never	never	sometimes	never	sometimes	Scarcely	Scarcely	never	never	never	never	Scarcely	never	never	never	never	never	never	sometimes	never	never	sometimes	no	no	no	no	no	no	no	no	no	no	8	4- Yes, at all times	3- Yes, to a large extent
161	Yes	no	59	154	89	female	Widower	I don't smoke at all	Without education		Shoulder, knee	sometimes	mostly	sometimes	Scarcely	sometimes	Scarcely	Scarcely	sometimes	sometimes	Scarcely	Scarcely	Scarcely	Scarcely	never	Scarcely	Scarcely	Scarcely	sometimes	Scarcely	never	never	never	never	never	never	no	no	no	no	no	no	no	no	no	no	8	2- Yes, to a moderate extent	1- Yes, to a simple extent
162	Yes	no	41	172	98	male	married	Currently a smoker	secondary		Neck, shoulder, upper back	Scarcely	sometimes	Scarcely	never	never	never	never	never	never	sometimes	never	Scarcely	never	never	never	never	never	mostly	never	never	never	never	never	never	never	no	no	no	no	no	no	no	no	no	no	5	0 = Not at all	0 = Not at all
163	Yes	no	73	169	80	female	divorced	I don't smoke at all	Without education		lower back	mostly	sometimes	sometimes	never	sometimes	sometimes	never	sometimes	sometimes	sometimes	Scarcely	mostly	Scarcely	mostly	mostly	sometimes	sometimes	Scarcely	Scarcely	never	Scarcely	Scarcely	never	Scarcely	sometimes	no	no	no	no	no	no	no	no	no	no	10	2- Yes, to a moderate extent	1- Yes, to a simple extent
164	Yes	no	37	170	61	female	married	I don't smoke at all	secondary		I do not experience pain in the areas mentioned above	Scarcely	Scarcely	Scarcely	never	never	never	never	never	never	never	never	never	never	sometimes	never	never	never	never	never	never	never	never	never	never	never	no	no	no	no	no	no	no	no	no	no	9	1- Yes, to a simple extent	0 = Not at all
165	Yes	no	30	162	78	male	single	Currently a smoker	secondary		Ankle and foot	Scarcely	Scarcely	Scarcely	never	never	never	never	never	never	never	never	never	never	never	never	never	never	never	never	never	never	never	never	never	never	no	no	no	no	no	Yes	no	no	no	no	6	0 = Not at all	0 = Not at all
166	Yes	no	75	164	78	male	Widower	Former smoker	secondary		lower back	sometimes	mostly	never	never	Scarcely	sometimes	sometimes	Scarcely	sometimes	never	never	sometimes	never	never	never	never	never	never	never	never	never	never	never	never	never	no	no	no	no	no	no	no	no	no	no	9	2- Yes, to a moderate extent	1- Yes, to a simple extent
167	Yes	no	90	168	59	female	Widower	I don't smoke at all	middle		Lower back, knee	mostly	mostly	sometimes	never	mostly	mostly	sometimes	Scarcely	mostly	sometimes	mostly	mostly	sometimes	Scarcely	mostly	sometimes	mostly	sometimes	Scarcely	Scarcely	sometimes	never	Scarcely	never	sometimes	no	no	no	no	no	no	no	no	no	no	9	3- Yes, to a large extent	4- Yes, at all times
168	Yes	no	39	173	78	male	married	Former smoker	Bachelor's		the neck	sometimes	sometimes	never	never	never	never	never	never	never	sometimes	never	never	never	never	never	never	never	mostly	never	never	never	never	never	never	never	no	no	no	no	no	no	no	no	no	no	7	1- Yes, to a simple extent	1- Yes, to a simple extent
169	Yes	no	36	179	89	male	married	Former smoker	Bachelor's		the neck	Scarcely	sometimes	never	never	never	never	Scarcely	never	never	sometimes	never	never	never	never	never	never	never	mostly	never	never	never	never	never	never	never	no	no	no	no	no	no	no	no	no	no	7	1- Yes, to a simple extent	0 = Not at all
170	Yes	no	34	156	70	female	married	I don't smoke at all	Bachelor's		the neck	sometimes	sometimes	sometimes	never	sometimes	Scarcely	sometimes	never	never	sometimes	never	sometimes	Scarcely	never	Scarcely	never	never	sometimes	never	sometimes	never	never	Scarcely	never	never	no	no	no	no	no	Yes	no	no	no	no	5	0 = Not at all	3- Yes, to a large extent
171	Yes	no	29	166	54	female	single	I don't smoke at all	Bachelor's		Shoulder, upper back, I do not experience pain in the areas mentioned above	Scarcely	sometimes	never	never	never	never	never	never	never	sometimes	never	never	never	never	never	never	never	sometimes	never	never	never	never	never	never	never	no	no	no	no	no	Yes	no	no	no	no	4	1- Yes, to a simple extent	0 = Not at all
172	Yes	no	30	168	79	female	single	I don't smoke at all	Bachelor's		lower back	Scarcely	sometimes	Scarcely	never	never	never	never	never	never	never	never	never	never	sometimes	never	never	never	sometimes	never	never	never	never	never	never	never	no	no	no	no	no	no	no	no	no	no	6	1- Yes, to a simple extent	0 = Not at all
173	Yes	no	29	171	73	male	single	Currently a smoker	Bachelor's		the neck	sometimes	sometimes	Scarcely	never	Scarcely	never	never	never	never	sometimes	never	never	never	never	never	never	never	mostly	Scarcely	never	never	never	never	never	never	no	no	no	no	no	no	no	no	no	no	5	1- Yes, to a simple extent	0 = Not at all
174	Yes	no	42	174	76	male	married	Currently a smoker	secondary		Lower back, knee	mostly	mostly	Scarcely	Scarcely	Scarcely	never	sometimes	Scarcely	Scarcely	sometimes	never	sometimes	never	never	never	never	never	sometimes	never	never	never	never	never	never	never	no	no	no	no	no	no	no	no	no	no	8	1- Yes, to a simple extent	1- Yes, to a simple extent
175	Yes	no	28	155	52	female	single	I don't smoke at all	Bachelor's		the neck	sometimes	Scarcely	never	never	Scarcely	never	never	never	never	sometimes	never	never	never	sometimes	never	sometimes	never	mostly	never	never	never	never	never	Scarcely	never	no	no	no	no	no	no	no	no	no	no	5	1- Yes, to a simple extent	2- Yes, to a moderate extent
176	Yes	no	50	130	60	female	married	I don't smoke at all	Without education		knee	always	always	sometimes	never	always	always	always	always	always	always	always	sometimes	always	always	always	never	sometimes	always	never	never	always	always	always	never	never	Yes	no	no	no	no	Yes	no	no	no	no	10	4- Yes, at all times	0 = Not at all
177	Yes	no	55	151	73	female	Widower	I don't smoke at all	primary		Knee, ankle and foot	sometimes	sometimes	never	never	sometimes	never	sometimes	sometimes	Scarcely	sometimes	Scarcely	sometimes	Scarcely	mostly	Scarcely	Scarcely	sometimes	Scarcely	Scarcely	Scarcely	sometimes	Scarcely	Scarcely	Scarcely	Scarcely	no	no	no	no	no	Yes	no	no	no	no	6	3- Yes, to a large extent	3- Yes, to a large extent
178	Yes	no	37	172	85	female	divorced	I don't smoke at all	primary		knee	Scarcely	mostly	Scarcely	Scarcely	sometimes	never	mostly	Scarcely	never	sometimes	never	never	never	never	Scarcely	Scarcely	never	sometimes	never	Scarcely	never	never	never	sometimes	sometimes	no	no	no	no	no	Yes	no	no	no	no	7	1- Yes, to a simple extent	2- Yes, to a moderate extent
179	Yes	no	63	152	81	female	divorced	I don't smoke at all	Without education		Shoulder, lower back, knee	sometimes	always	always	Scarcely	always	always	always	sometimes	always	Scarcely	always	always	Scarcely	always	always	Scarcely	always	always	always	Scarcely	always	always	always	never	always	no	Yes	no	no	Yes	Yes	no	no	no	Yes	10	4- Yes, at all times	3- Yes, to a large extent
180	Yes	no	30	160	80	female	married	I don't smoke at all	middle		the shoulder	sometimes	sometimes	never	never	never	always	always	sometimes	sometimes	sometimes	Scarcely	never	sometimes	never	never	sometimes	sometimes	always	sometimes	mostly	always	mostly	sometimes	never	never	no	no	no	no	no	no	no	no	no	no	8	2- Yes, to a moderate extent	1- Yes, to a simple extent
181	Yes	no	57	172	80	male	Widower	Former smoker	middle		knee	mostly	sometimes	sometimes	never	sometimes	Scarcely	sometimes	sometimes	sometimes	sometimes	never	sometimes	never	never	never	sometimes	never	sometimes	never	never	Scarcely	never	never	never	never	no	no	no	no	no	no	no	no	no	no	8	2- Yes, to a moderate extent	1- Yes, to a simple extent
182	Yes	no	66	171	86	female	married	I don't smoke at all	primary		lower back	mostly	sometimes	sometimes	never	sometimes	sometimes	never	sometimes	Scarcely	Scarcely	never	sometimes	mostly	Scarcely	sometimes	sometimes	Scarcely	Scarcely	never	never	never	never	mostly	sometimes	never	no	no	no	no	no	no	no	no	no	no	7	4- Yes, at all times	4- Yes, at all times
183	Yes	no	76	168	97	female	married	I don't smoke at all	middle		lower back	always	mostly	sometimes	Scarcely	mostly	sometimes	sometimes	sometimes	sometimes	sometimes	Scarcely	mostly	sometimes	Scarcely	mostly	mostly	mostly	mostly	Scarcely	never	sometimes	sometimes	Scarcely	Scarcely	sometimes	no	no	no	no	no	no	no	no	no	no	9	3- Yes, to a large extent	3- Yes, to a large extent
184	Yes	no	74	170	98	female	married	I don't smoke at all	primary		knee	always	always	sometimes	Scarcely	mostly	sometimes	mostly	always	always	sometimes	sometimes	sometimes	Scarcely	Scarcely	always	mostly	mostly	mostly	never	never	mostly	Scarcely	never	mostly	Scarcely	no	no	no	no	no	no	no	no	no	no	9	4- Yes, at all times	3- Yes, to a large extent
185	Yes	no	69	173	70	male	Widower	I don't smoke at all	primary		lower back	always	always	mostly	Scarcely	sometimes	sometimes	sometimes	mostly	mostly	Scarcely	Scarcely	mostly	sometimes	always	mostly	always	mostly	mostly	Scarcely	never	sometimes	Scarcely	Scarcely	sometimes	Scarcely	no	no	no	no			no	no	no	no	9	4- Yes, at all times	4- Yes, at all times
186	Yes	no	65	164	71	male	divorced	I don't smoke at all	primary		Lower back, knee	mostly	always	mostly	Scarcely	sometimes	Scarcely	Scarcely	Scarcely	mostly	sometimes	never	sometimes	never	Scarcely	sometimes	mostly	Scarcely	mostly	never	never	Scarcely	Scarcely	Scarcely	sometimes	Scarcely	no	no	no	no	no	no	no	no	no	no	10	4- Yes, at all times	3- Yes, to a large extent
187	Yes	no	38	173	76	male	married	Currently a smoker	Bachelor's		the neck	mostly	mostly	Scarcely	never	never	never	Scarcely	never	never	mostly	never	sometimes	never	sometimes	never	Scarcely	never	always	never	never	never	never	never	never	never	no	no	no	no	no	no	no	no	no	no	6	1- Yes, to a simple extent	0 = Not at all
188	Yes	no	58	177	94	male	married	I don't smoke at all	secondary		lower back	mostly	always	sometimes	Scarcely	mostly	never	sometimes	never	mostly	mostly	never	sometimes	never	never	sometimes	sometimes	Scarcely	mostly	never	never	never	never	never	never	never	no	no	no	no	no	no	no	no	no	no	7	2- Yes, to a moderate extent	0 = Not at all
189	Yes	no	47	156	81	female	divorced	Currently a smoker	Bachelor's		knee	Scarcely	sometimes	Scarcely	never	Scarcely	Scarcely	Scarcely	sometimes	sometimes	sometimes	never	mostly	sometimes	sometimes	sometimes	never	never	Scarcely	never	never	sometimes	sometimes	Scarcely	never	Scarcely	no	no	no	no	no	no	no	no	no	no	5	0 = Not at all	1- Yes, to a simple extent
190	Yes	no	69	170	87	male	married	Former smoker	secondary		knee	mostly	always	Scarcely	never	sometimes	never	Scarcely	mostly	mostly	Scarcely	sometimes	Scarcely	never	never	sometimes	never	never	sometimes	never	never	sometimes	Scarcely	never	never	never	no	no	no	no	no	no	no	no	no	no	7	4- Yes, at all times	3- Yes, to a large extent
191	Yes	no	56	170	85	male	married	Currently a smoker	Bachelor's		Wrist/palm	Scarcely	Scarcely	never	Scarcely	Scarcely	never	never	never	sometimes	Scarcely	never	never	never	never	never	Scarcely	never	sometimes	never	never	never	never	never	never	never	no	no	no	no	no	no	no	no	no	no	6	1- Yes, to a simple extent	0 = Not at all
192	Yes	no	40	155	82	female	married	I don't smoke at all	Master's		Neck, lower back, hip, thigh, knee, ankle and foot	mostly	sometimes	Scarcely	sometimes	never	never	never	sometimes	Scarcely	mostly	Scarcely	Scarcely	sometimes	mostly	sometimes	never	sometimes	mostly	never	never	Scarcely	sometimes	sometimes	never	never	no	no	no	no	no	no	no	no	no	no	9	2- Yes, to a moderate extent	2- Yes, to a moderate extent
193	Yes	no	46	158	72	female	married	I don't smoke at all	Bachelor's		Ankle and foot	mostly	sometimes	sometimes	sometimes	sometimes	sometimes	sometimes	never	sometimes	sometimes	Scarcely	sometimes	sometimes	never	never	sometimes	sometimes	Scarcely	Scarcely	Scarcely	Scarcely	Scarcely	Scarcely	never	never	no	no	no	no	no	Yes	no	no	no	no	5	1- Yes, to a simple extent	0 = Not at all
194	Yes	no	31	174	86	male	single	I don't smoke at all	Bachelor's		lower back	Scarcely	Scarcely	never	never	never	never	never	never	never	never	never	never	never	Scarcely	never	never	never	Scarcely	never	never	never	never	never	never	never	no	no	no	no	no	no	no	no	no	no	6	1- Yes, to a simple extent	0 = Not at all
195	Yes	no	33	165	80	female	single	I don't smoke at all	Bachelor's		the neck	sometimes	mostly	sometimes	never	never	never	never	never	never	sometimes	never	never	never	Scarcely	never	sometimes	never	always	never	never	never	never	never	never	never	no	no	no	no	no	no	no	no	no	no	7	2- Yes, to a moderate extent	1- Yes, to a simple extent
196	Yes	no	34	168	60	male	married	Currently a smoker	secondary		lower back	sometimes	always	sometimes	Scarcely	never	never	never	never	never	Scarcely	never	Scarcely	never	never	never	never	never	sometimes	never	never	never	never	never	never	never	no	no	no	no	no	no	no	no	no	no	8	1- Yes, to a simple extent	0 = Not at all
197	Yes	no	33	169	65	male	married	Currently a smoker	secondary		Ankle and foot	never	Scarcely	never	never	never	never	never	never	never	sometimes	never	sometimes	never	Scarcely	never	never	never	sometimes	never	never	never	never	never	never	never	no	no	no	no	no	no	no	no	no	no	5	1- Yes, to a simple extent	0 = Not at all
198	Yes	no	24	162	65	male	single	Former smoker	Bachelor's		upper back	Scarcely	sometimes	Scarcely	never	Scarcely	never	Scarcely	never	never	sometimes	Scarcely	mostly	Scarcely	sometimes	Scarcely	Scarcely	Scarcely	mostly	never	never	never	never	never	never	never	no	no	no	no	no	no	no	no	no	no	7	2- Yes, to a moderate extent	1- Yes, to a simple extent
199	Yes	no	60	157	52	female	married	I don't smoke at all	Bachelor's		knee	Scarcely	sometimes	sometimes	never	sometimes	never	mostly	mostly	always	sometimes	Scarcely	sometimes	never	sometimes	never	sometimes	Scarcely	sometimes	Scarcely	never	Scarcely	never	never	never	never	no	no	no	no	no	no	no	no	no	no	10	3- Yes, to a large extent	3- Yes, to a large extent
200	Yes	no	35	151	65	female	married	I don't smoke at all	Bachelor's		Lower back, hip and thigh	sometimes	always	Scarcely	never	never	never	never	never	never	sometimes	never	sometimes	never	sometimes	sometimes	never	never	Scarcely	never	never	never	never	never	Scarcely	never	no	no	no	no	no	no	no	no	no	no	9	3- Yes, to a large extent	2- Yes, to a moderate extent
201	Yes	no	61	152	70	female	Widower	I don't smoke at all	middle		Shoulder, knee	always	always	mostly	never	sometimes	Scarcely	sometimes	always	mostly	sometimes	Scarcely	Scarcely	Scarcely	sometimes	always	sometimes	Scarcely	sometimes	never	never	Scarcely	never	never	never	never	no	no	no	no	no	Yes	no	no	no	no	8	4- Yes, at all times	4- Yes, at all times
202	Yes	no	29	178	104	male	married	Former smoker	Bachelor's		Lower back, wrist/palm, ankle and foot	mostly	mostly	sometimes	Scarcely	sometimes	never	never	always	always	sometimes	never	Scarcely	never	mostly	always	Scarcely	sometimes	sometimes	never	never	sometimes	never	never	Scarcely	never	no	no	no	no	no	no	no	no	no	no	9	2- Yes, to a moderate extent	1- Yes, to a simple extent
203	Yes	no	55	165	65	male	married	I don't smoke at all	secondary		the neck	mostly	mostly	sometimes	never	Scarcely	never	never	never	never	always	never	sometimes	never	never	never	never	never	always	Scarcely	never	never	never	never	never	never	no	no	no	no	no	no	no	no	no	no	8	2- Yes, to a moderate extent	1- Yes, to a simple extent
204	Yes	no	62	168	72	male	married	I don't smoke at all	Bachelor's		Neck, shoulder	sometimes	sometimes	Scarcely	never	never	never	Scarcely	never	never	mostly	never	never	never	never	never	never	never	always	never	never	never	never	never	Scarcely	never	no	no	no	no	no	no	no	no	no	no	6	1- Yes, to a simple extent	0 = Not at all
205	Yes	no	51	179	103	male	married	Former smoker	secondary		knee	mostly	mostly	never	never	never	Scarcely	never	sometimes	sometimes	sometimes	never	mostly	never	never	never	never	never	never	never	never	never	never	never	never	never	no	no	no	no	no	no	no	no	no	no	8	3- Yes, to a large extent	3- Yes, to a large extent
206	Yes	no	25	161	53	female	single	I don't smoke at all	Master's		Neck, shoulder, upper back, wrist/palm	sometimes	sometimes	Scarcely	never	never	never	never	never	never	sometimes	never	Scarcely	never	never	never	never	sometimes	always	never	never	never	never	never	Scarcely	never	no	no	no	no	no	no	no	no	no	no	5	1- Yes, to a simple extent	1- Yes, to a simple extent
207	Yes	no	63	166	94	male	married	I don't smoke at all	Bachelor's		Neck, wrist/palm	never	never	never	never	never	never	never	never	never	never	never	never	never	never	never	never	never	sometimes	never	never	never	never	never	never	never	no	no	no	no	no	no	no	no	no	no	4	0 = Not at all	0 = Not at all
208	Yes	no	57	150	57	female	married	I don't smoke at all	Bachelor's		Neck, shoulder, knee	mostly	always	sometimes	never	Scarcely	never	never	never	sometimes	sometimes	never	never	never	sometimes	mostly	Scarcely	Scarcely	always	never	never	never	never	never	Scarcely	Scarcely	no	no	no	no	no	no	no	no	no	no	9	3- Yes, to a large extent	3- Yes, to a large extent
209	Yes	no	40	178	87	male	married	I don't smoke at all	Bachelor's		knee	mostly	mostly	Scarcely	Scarcely	never	never	Scarcely	never	never	Scarcely	never	never	never	never	never	never	never	sometimes	never	never	never	never	never	never	never	no	no	no	no	no	no	no	no	no	no	7	2- Yes, to a moderate extent	1- Yes, to a simple extent
210	Yes	no	39	164	64	male	married	I don't smoke at all	Bachelor's		knee	never	sometimes	never	never	never	never	never	never	never	sometimes	never	never	never	never	never	never	Scarcely	sometimes	Scarcely	never	never	never	never	never	never	no	no	no	no	no	no	no	no	no	no	6	2- Yes, to a moderate extent	1- Yes, to a simple extent
211	Yes	no	44	168	75	male	married	I don't smoke at all	secondary		Hip, thigh, knee	sometimes	sometimes	Scarcely	never	Scarcely	never	never	sometimes	never	Scarcely	never	sometimes	never	never	always	never	Scarcely	sometimes	Scarcely	never	never	Scarcely	never	never	always	no	no	no	no	no	no	no	no	no	no	8	3- Yes, to a large extent	1- Yes, to a simple extent
212	Yes	no	49	157	71	female	married	I don't smoke at all	middle		Lower back, hip, thigh, knee	mostly	always	sometimes	Scarcely	Scarcely	never	Scarcely	sometimes	mostly	sometimes	never	sometimes	never	mostly	always	sometimes	Scarcely	sometimes	never	never	never	never	never	sometimes	sometimes	no	no	no	no	no	no	no	no	no	no	9	4- Yes, at all times	4- Yes, at all times
213	Yes	no	23	160	59	female	single	I don't smoke at all	Bachelor's		the neck	Scarcely	Scarcely	Scarcely	never	never	never	Scarcely	never	never	never	never	never	never	mostly	never	Scarcely	never	always	sometimes	Scarcely	never	never	never	never	never	no	no	no	no	no	Yes	no	no	no	no	5	0 = Not at all	0 = Not at all
214	Yes	no	34	176	75	male	single	Former smoker	Bachelor's		Neck, shoulder, knee	Scarcely	sometimes	Scarcely	Scarcely	never	never	Scarcely	sometimes	sometimes	mostly	never	never	never	never	never	Scarcely	never	always	never	never	never	never	never	Scarcely	never	no	no	no	no	no	no	no	no	no	no	7	2- Yes, to a moderate extent	0 = Not at all
215	Yes	no	40	155	75	female	single	I don't smoke at all	secondary		lower back	sometimes	sometimes	sometimes	Scarcely	Scarcely	never	never	never	never	sometimes	never	Scarcely	never	never	sometimes	mostly	sometimes	sometimes	Scarcely	never	never	never	never	Scarcely	never	no	no	no	no	no	no	no	no	no	no	8	3- Yes, to a large extent	3- Yes, to a large extent
216	Yes	no	20	169	69	female	single	I don't smoke at all	Bachelor's		knee	Scarcely	Scarcely	Scarcely	Scarcely	never	never	never	never	never	Scarcely	never	Scarcely	never	never	never	never	Scarcely	Scarcely	never	never	never	never	never	Scarcely	never	no	no	no	no	no	no	no	no	no	no	6	2- Yes, to a moderate extent	0 = Not at all
217	Yes	no	58	159	61	female	married	I don't smoke at all	Bachelor's		lower back	Scarcely	never	never	never	never	never	never	never	never	Scarcely	never	Scarcely	never	never	never	Scarcely	never	sometimes	never	never	never	never	never	Scarcely	sometimes	no	no	no	no	no	no	no	no	no	no	6	2- Yes, to a moderate extent	0 = Not at all
218	Yes	no	25	178	116	male	single	Currently a smoker	Bachelor's		Neck, upper back	Scarcely	Scarcely	never	never	never	never	Scarcely	sometimes	never	Scarcely	Scarcely	Scarcely	Scarcely	Scarcely	sometimes	Scarcely	Scarcely	always	never	never	never	never	never	never	never	no	no	no	no	no	no	no	no	no	no	5	1- Yes, to a simple extent	0 = Not at all
219	Yes	no	40	170	93	male	married	Former smoker	Bachelor's		lower back	sometimes	mostly	Scarcely	never	Scarcely	never	never	never	never	sometimes	never	never	never	never	sometimes	never	never	sometimes	never	never	never	never	never	never	never	no	no	no	no	no	no	no	no	no	no	8	3- Yes, to a large extent	2- Yes, to a moderate extent
220	Yes	no	57	169	94	male	married	Currently a smoker	Bachelor's		Neck, shoulder	Scarcely	Scarcely	never	Scarcely	never	never	Scarcely	never	never	mostly	never	never	never	always	never	never	never	always	Scarcely	never	never	never	never	never	never	no	no	no	no	no	no	no	no	no	no	8	2- Yes, to a moderate extent	1- Yes, to a simple extent
221	Yes	no	30	165	80	male	single	Currently a smoker	secondary		the shoulder	sometimes	sometimes	sometimes	sometimes	mostly	Scarcely	Scarcely	sometimes	sometimes	sometimes	Scarcely	always	sometimes	mostly	sometimes	Scarcely	sometimes	sometimes	Scarcely	sometimes	mostly	Scarcely	sometimes	mostly	Scarcely	no	no	no	no	no	no	no	no	no	no	5	2- Yes, to a moderate extent	2- Yes, to a moderate extent
222	Yes	no	46	156	72	female	married	I don't smoke at all	Bachelor's		Lower back, wrist/palm	Scarcely	mostly	sometimes	Scarcely	Scarcely	never	never	sometimes	never	sometimes	never	never	never	sometimes	never	Scarcely	never	mostly	never	never	never	never	never	Scarcely	never	no	no	no	no	no	no	no	no	no	no	7	3- Yes, to a large extent	1- Yes, to a simple extent
223	Yes	no	41	166	73	male	married	Currently a smoker	Bachelor's		Neck, lower back	sometimes	sometimes	Scarcely	never	never	never	sometimes	never	never	mostly	never	sometimes	never	never	never	never	never	always	never	never	never	never	never	never	never	no	no	no	no	no	no	no	no	no	no	6	1- Yes, to a simple extent	0 = Not at all
224	Yes	no	39	150	54	female	married	I don't smoke at all	Without education		lower back	sometimes	sometimes	sometimes	Scarcely	never	never	never	never	never	sometimes	never	sometimes	never	Scarcely	never	never	never	sometimes	never	never	never	never	never	never	never	no	no	no	no			no	no	no	no	6	1- Yes, to a simple extent	0 = Not at all
225	Yes	no	62	153	81	female	married	Former smoker	Bachelor's		knee	mostly	always	sometimes	Scarcely	sometimes	Scarcely	sometimes	sometimes	mostly	Scarcely	never	sometimes	never	never	sometimes	sometimes	Scarcely	sometimes	Scarcely	never	never	never	never	never	never	no	no	no	no	no	no	no	no	no	no	9	4- Yes, at all times	3- Yes, to a large extent
226	Yes	no	63	155	84	female	married	Former smoker	Bachelor's		Ankle and foot	mostly	mostly	Scarcely	never	sometimes	never	never	sometimes	never	sometimes	never	sometimes	Scarcely	never	always	sometimes	never	sometimes	never	never	never	never	never	Scarcely	never	no	no	no	no	no	no	no	no	no	no	8	4- Yes, at all times	3- Yes, to a large extent
227	Yes	no	64	152	75	female	Widower	I don't smoke at all	Bachelor's		the shoulder	Scarcely	Scarcely	Scarcely	Scarcely	never	never	never	never	never	sometimes	never	sometimes	never	never	sometimes	sometimes	never	mostly	Scarcely	Scarcely	never	never	never	Scarcely	never	no	no	no	no	no	Yes	no	no	no	no	5	2- Yes, to a moderate extent	0 = Not at all
228	Yes	no	20	153	90	female	single	I don't smoke at all	Bachelor's		lower back	sometimes	mostly	never	never	sometimes	sometimes	never	never	always	sometimes	sometimes	mostly	never	never	never	never	Scarcely	never	Scarcely	sometimes	never	never	Scarcely	never	Scarcely	no	no	no	no	no	Yes	no	no	no	no	9	3- Yes, to a large extent	3- Yes, to a large extent
229	Yes	no	41	170	84	male	married	Currently a smoker	Bachelor's		Wrist/palm	Scarcely	Scarcely	never	never	never	never	Scarcely	never	never	sometimes	never	Scarcely	never	Scarcely	never	Scarcely	never	sometimes	Scarcely	never	never	never	never	never	never	no	no	no	no	no	no	no	no	no	no	5	0 = Not at all	0 = Not at all
230	Yes	no	33	168	85	male	single	I don't smoke at all	Bachelor's		Upper back, hip and thigh	never	sometimes	never	never	never	never	never	Scarcely	never	sometimes	never	Scarcely	never	never	sometimes	never	never	sometimes	Scarcely	never	never	never	never	never	mostly	no	no	no	no	no	Yes	no	no	no	no	7	1- Yes, to a simple extent	0 = Not at all
231	Yes	no	60	160	78	female	Widower	I don't smoke at all	primary		Shoulder, knee	mostly	mostly	always	sometimes	sometimes	Scarcely	mostly	always	mostly	sometimes	Scarcely	sometimes	sometimes	sometimes	mostly	mostly	sometimes	sometimes	Scarcely	never	Scarcely	Scarcely	never	never	sometimes	no	no	no	no	no	no	no	no	no	no	9	3- Yes, to a large extent	2- Yes, to a moderate extent
232	Yes	no	33	155	80	female	divorced	I don't smoke at all	Bachelor's		Ankle and foot	Scarcely	sometimes	sometimes	Scarcely	never	never	never	Scarcely	never	sometimes	never	sometimes	never	sometimes	sometimes	sometimes	never	sometimes	never	never	never	never	never	never	never	no	no	no	no	no	no	no	no	no	no	8	3- Yes, to a large extent	2- Yes, to a moderate extent
233	Yes	no	61	165	79	female	married	I don't smoke at all	primary		knee	mostly	always	sometimes	Scarcely	sometimes	sometimes	sometimes	always	mostly	sometimes	Scarcely	sometimes	Scarcely	Scarcely	mostly	sometimes	Scarcely	sometimes	sometimes	Scarcely	Scarcely	Scarcely	never	never	never	no	no	no	no	no	Yes	no	no	no	no	6	3- Yes, to a large extent	2- Yes, to a moderate extent
234	Yes	no	76	169	73	female	married	I don't smoke at all	Without education		Shoulder, upper back, knee	mostly	always	mostly	Scarcely	sometimes	always	mostly	mostly	always	sometimes	Scarcely	sometimes	sometimes	Scarcely	mostly	mostly	mostly	mostly	sometimes	Scarcely	Scarcely	Scarcely	Scarcely	Scarcely	sometimes	no	Yes	no	no	no	Yes	no	no	no	no	8	3- Yes, to a large extent	3- Yes, to a large extent
235	Yes	no	31	170	83	male	single	Currently a smoker	Bachelor's		Ankle and foot	sometimes	Scarcely	never	never	sometimes	Scarcely	mostly	Scarcely	Scarcely	Scarcely	sometimes	mostly	mostly	sometimes	sometimes	Scarcely	Scarcely	Scarcely	Scarcely	mostly	mostly	Scarcely	Scarcely	Scarcely	sometimes	no	no	no	no	no	no	no	no	no	no	7	2- Yes, to a moderate extent	0 = Not at all
236	Yes	no	49	140	90	male	married	Former smoker	secondary		the neck	mostly	mostly	Scarcely	Scarcely	mostly	Scarcely	sometimes	mostly	mostly	sometimes	Scarcely	sometimes	sometimes	never	mostly	Scarcely	mostly	always	Scarcely	Scarcely	sometimes	Scarcely	always	never	never	no	no	no	no	no	no	no	no	no	no	8	1- Yes, to a simple extent	1- Yes, to a simple extent
237	Yes	no	55	162	57	female	married	I don't smoke at all	Without education		knee	sometimes	sometimes	Scarcely	Scarcely	Scarcely	sometimes	sometimes	mostly	Scarcely	Scarcely	never	sometimes	Scarcely	never	mostly	sometimes	Scarcely	never	never	never	never	mostly	never	Scarcely	never	no	no	no	no	no	no	no	no	no	no	6	2- Yes, to a moderate extent	0 = Not at all
238	Yes	no	52	160	107	male	married	I don't smoke at all	middle		knee	sometimes	mostly	never	sometimes	mostly	never	Scarcely	Scarcely	Scarcely	Scarcely	Scarcely	never	never	never	mostly	never	Scarcely	never	never	never	Scarcely	Scarcely	sometimes	never	never	no	no	no	no	no	no	no	no	no	no	9	0 = Not at all	0 = Not at all
239	Yes	no	38	160	72	male	married	Currently a smoker	secondary		the neck	mostly	mostly	never	never	never	never	never	sometimes	sometimes	sometimes	never	sometimes	sometimes	never	always	never	mostly	mostly	never	Scarcely	never	mostly	never	never	never	no	no	no	no	no	no	no	no	no	no	10	0 = Not at all	0 = Not at all
240	Yes	no	30	166	80	male	divorced	Currently a smoker	secondary		upper back	mostly	sometimes	never	never	sometimes	never	Scarcely	mostly	mostly	sometimes	sometimes	mostly	sometimes	never	mostly	never	sometimes	Scarcely	never	Scarcely	sometimes	sometimes	sometimes	never	never	no	no	no	no	no	no	no	no	no	no	9	1- Yes, to a simple extent	0 = Not at all
241	Yes	no	48	178	106	male	divorced	Currently a smoker	middle		lower back	sometimes	Scarcely	never	Scarcely	sometimes	never	never	never	sometimes	sometimes	sometimes	never	Scarcely	mostly	mostly	sometimes	sometimes	sometimes	never	never	Scarcely	Scarcely	Scarcely	never	never	no	no	no	no	no	no	no	no	no	no	8	1- Yes, to a simple extent	1- Yes, to a simple extent
242	Yes	no	35	164	74	male	single	I don't smoke at all	secondary		the shoulder	sometimes	Scarcely	never	never	never	never	never	never	never	Scarcely	never	sometimes	Scarcely	never	sometimes	never	Scarcely	Scarcely	never	never	sometimes	never	sometimes	Scarcely	never	no	no	no	no	no	no	no	no	no	no	7	1- Yes, to a simple extent	0 = Not at all
243	Yes	no	51	172	75	male	married	Currently a smoker	middle		Hip and thigh	always	sometimes	never	sometimes	Scarcely	never	sometimes	sometimes	sometimes	sometimes	Scarcely	never	Scarcely	never	mostly	never	sometimes	never	never	Scarcely	Scarcely	sometimes	mostly	never	mostly	no	no	no	no	no	no	no	no	no	no	8	0 = Not at all	0 = Not at all
244	Yes	no	30	170	72	male	single	Currently a smoker	Master's		lower back	Scarcely	Scarcely	never	never	sometimes	never	sometimes	sometimes	sometimes	Scarcely	Scarcely	Scarcely	never	never	Scarcely	never	Scarcely	never	never	never	Scarcely	never	never	never	never	no	no	no	no	no	no	no	no	no	no	7	0 = Not at all	0 = Not at all
245	Yes	no	70	159	60	female	married	I don't smoke at all	Without education		lower back	mostly	always	never	never	sometimes	mostly	never	always	always	sometimes	sometimes	never	never	never	mostly	never	sometimes	always	Scarcely	never	sometimes	sometimes	never	never	Scarcely	no	no	no	no	no	no	no	no	no	no	8	3- Yes, to a large extent	3- Yes, to a large extent
246	Yes	no	40	177	91	male	married	Currently a smoker	secondary		the neck	never	Scarcely	never	never	never	never	never	never	never	mostly	Scarcely	Scarcely	Scarcely	Scarcely	Scarcely	Scarcely	Scarcely	mostly	never	never	never	never	never	never	never	no	no	no	no	Yes	no	no	no	no	no	4	0 = Not at all	0 = Not at all
247	Yes	no	35	155	56	female	divorced	I don't smoke at all	Bachelor's		Neck, shoulder	sometimes	sometimes	mostly	Scarcely	Scarcely	sometimes	sometimes	sometimes	Scarcely	mostly	Scarcely	mostly	Scarcely	sometimes	Scarcely	mostly	sometimes	sometimes	Scarcely	never	never	Scarcely	sometimes	sometimes	never	no	no	no	no	Yes	Yes	no	no	Yes	Yes	6	2- Yes, to a moderate extent	2- Yes, to a moderate extent
248	Yes	no	75	169	57	male	married	Former smoker	primary		knee	sometimes	sometimes	never	never	sometimes	sometimes	sometimes	sometimes	Scarcely	Scarcely	Scarcely	never	sometimes	never	sometimes	never	sometimes	sometimes	Scarcely	never	Scarcely	Scarcely	never	never	never	no	no	no	no	no	no	no	no	no	no	7	3- Yes, to a large extent	3- Yes, to a large extent
249	Yes	no	31	165	80	female	married	I don't smoke at all	Bachelor's		knee	Scarcely	Scarcely	never	never	never	never	never	never	never	mostly	never	sometimes	never	never	never	never	never	always	Scarcely	never	never	never	never	never	never	no	no	no	no	no	no	no	no	no	no	4	1- Yes, to a simple extent	0 = Not at all
250	Yes	no	33	162	75	female	married	I don't smoke at all	secondary		lower back	Scarcely	Scarcely	Scarcely	Scarcely	never	never	never	never	never	Scarcely	never	never	never	never	never	Scarcely	never	never	Scarcely	never	never	never	never	never	never	no	no	no	no	no	no	no	no	no	no	6	1- Yes, to a simple extent	0 = Not at all
251	Yes	no	22	164	54	female	single	I don't smoke at all	secondary		knee	never	never	sometimes	sometimes	never	never	never	never	never	sometimes	never	never	never	never	never	never	never	sometimes	never	never	never	never	never	never	never	no	no	no	no	no	Yes	no	no	no	no	5	2- Yes, to a moderate extent	0 = Not at all
252	Yes	no	50	145	70	female	married	I don't smoke at all	primary		knee	sometimes	sometimes	sometimes	never	Scarcely	never	never	sometimes	sometimes	sometimes	sometimes	never	never	never	sometimes	never	sometimes	sometimes	sometimes	never	sometimes	sometimes	never	never	never	no	no	no	no	no	no	no	no	no	no	7	0 = Not at all	0 = Not at all
253	Yes	no	31	168	58	female	single	I don't smoke at all	Bachelor's		the neck	never	sometimes	never	never	never	never	mostly	never	never	sometimes	never	never	never	never	never	never	never	always	Scarcely	never	never	never	never	never	never	no	no	no	no	no	no	no	no	no	no	6	0 = Not at all	0 = Not at all
254	Yes	no	21	155	70	female	single	I don't smoke at all	Bachelor's		knee	Scarcely	Scarcely	sometimes	sometimes	never	never	never	never	never	never	never	never	never	never	never	never	never	never	Scarcely	never	never	never	never	Scarcely	never	no	no	no	no	no	no	no	no	no	no	3	3- Yes, to a large extent	0 = Not at all
255	Yes	no	35	163	97	female	married	I don't smoke at all	Bachelor's		lower back	Scarcely	Scarcely	sometimes	Scarcely	never	never	never	never	never	sometimes	never	never	never	never	mostly	Scarcely	Scarcely	Scarcely	Scarcely	never	never	never	never	never	sometimes	no	no	no	no	no	no	no	no	no	no	7	1- Yes, to a simple extent	0 = Not at all
256	Yes	no	38	160	53	female	married	I don't smoke at all	Bachelor's		Neck, upper back	never	never	sometimes	Scarcely	never	never	Scarcely	never	never	never	never	never	never	never	never	never	never	always	never	never	never	never	never	never	never	no	no	no	no	no	no	no	no	no	no	5	0 = Not at all	0 = Not at all
257	Yes	no	29	152	62	female	single	I don't smoke at all	Bachelor's		knee	Scarcely	Scarcely	never	never	never	never	never	never	never	sometimes	never	sometimes	never	Scarcely	never	never	never	sometimes	never	never	never	Scarcely	never	never	sometimes	no	no	no	no	no	no	no	no	no	no	4	1- Yes, to a simple extent	0 = Not at all
258	Yes	no	29	160	67	male	married	Currently a smoker	secondary		lower back	mostly	sometimes	sometimes	never	never	never	sometimes	sometimes	sometimes	mostly	never	never	sometimes	never	sometimes	mostly	mostly	never	never	Scarcely	sometimes	never	sometimes	mostly	never	no	no	no	no	no	no	no	no	no	no	8	2- Yes, to a moderate extent	2- Yes, to a moderate extent
259	Yes	no	36	172	104	male	divorced	Currently a smoker	middle		knee	always	Scarcely	Scarcely	Scarcely	never	Scarcely	never	Scarcely	Scarcely	mostly	Scarcely	sometimes	sometimes	sometimes	sometimes	Scarcely	sometimes	sometimes	never	never	never	sometimes	sometimes	never	never	no	no	no	no	no	no	no	no	no	no	9	2- Yes, to a moderate extent	2- Yes, to a moderate extent
260	Yes	no	34	124	94	female	married	I don't smoke at all	primary		the shoulder	Scarcely	sometimes	never	never	sometimes	never	never	never	never	never	never	never	never	never	never	never	never	never	sometimes	never	never	never	never	never	Scarcely	no	no	no	no	no	no	no	no	no	no	0	0 = Not at all	0 = Not at all
261	Yes	no	24	168	106	male	single	Currently a smoker	secondary		the neck	Scarcely	Scarcely	never	never	never	never	never	never	never	Scarcely	never	mostly	never	never	never	never	never	never	never	Scarcely	sometimes	never	never	never	never	no	no	no	no	no	no	no	no	no	no	7	1- Yes, to a simple extent	0 = Not at all
262	Yes	no	30	170	115	male	married	Currently a smoker	Bachelor's		Hip and thigh	mostly	Scarcely	never	never	never	never	mostly	never	never	sometimes	never	Scarcely	never	never	never	never	sometimes	never	Scarcely	never	never	never	never	never	never	no	no	no	no	no	no	no	no	no	no	8	1- Yes, to a simple extent	1- Yes, to a simple extent
263	Yes	no	33	169	70	female	married	Currently a smoker	Bachelor's		Ankle and foot	Scarcely	sometimes	Scarcely	never	Scarcely	never	never	mostly	Scarcely	always	Scarcely	Scarcely	Scarcely	mostly	Scarcely	Scarcely	sometimes	never	never	Scarcely	sometimes	mostly	never	Scarcely	never	no	no	no	no	no	no	no	no	no	no	9	2- Yes, to a moderate extent	2- Yes, to a moderate extent
264	Yes	no	36	175	77	male	married	Former smoker	secondary		Lower back, hip and thigh	Scarcely	Scarcely	never	Scarcely	never	never	never	sometimes	sometimes	mostly	Scarcely	Scarcely	never	never	sometimes	never	never	never	never	Scarcely	Scarcely	never	never	never	Scarcely	no	no	no	no	no	no	no	no	no	no	8	1- Yes, to a simple extent	1- Yes, to a simple extent
[truncated: 55 more columns]
